# Supplementary material for: Effects of boryl, phosphino, and phosphonio substituents on optical, electrochemical, and photophysical properties of 2,5-dithienylphospholes and 2-phenyl-5-thienylphospholes
Source: Royal Society of Chemistry journal article supplement (doi:10.1039/c5dt03362d), 2015-11-09
Supplement: c5dt03362d1.pdf [file c5dt03362d1.pdf]

## **Supplementary Information**

# **Effects of Boryl, Phosphino, and Phosponio Substituents on Optical, Electrochemical, and Photophysical Properties of 2,5-Dithienylphospholes and 2-Phenyl-5-thienylphospholes**

Yoshinari Koyanagi, Yoshifumi Kimura, and Yoshihiro Matano\*

## Synthesis of **1b**, **2b**, **10**, **11**, and **12**

**Synthesis of 1b.** A mixture of 1-phenyl-1,6-heptadiyne (0.900 g, 5.3 mmol), 2-bromothiophene (1.1 mL, 11 mmol), PdCl<sub>2</sub>(PPh<sub>3</sub>)<sub>2</sub> (0.151 g, 0.21 mmol), CuI (0.021 g, 0.11 mmol), NEt<sub>3</sub> (4 mL), and toluene (12 mL) was stirred for 14 h at room temperature. The resulting mixture was added to NH<sub>4</sub>Cl aq (20 mL), and the aqueous layer was separated and extracted with AcOEt (3 × 20 mL). The combined organic extracts were washed with NaHCO<sub>3</sub> aq (20 mL), water (20 mL), and brine (20 mL) in this order, dried over Na<sub>2</sub>SO<sub>4</sub>, and evaporated to leave an oily residue, which was then chromatographed on silica gel using hexane as an eluent. Compound **1b** was isolated as a pale yellow oil (0.862 g, 64%): *R*<sub>f</sub> = 0.6 (hexane/AcOEt = 20/1); <sup>1</sup>H NMR (400 MHz, CDCl<sub>3</sub>): δ = 1.91 (tt, *J* = 7.0, 7.1 Hz, 2H), 2.58 (t, *J* = 7.0 Hz, 2H), 2.62 (t, *J* = 7.1 Hz, 2H), 6.94 (dd, *J* = 3.6, 5.1 Hz, 1H), 7.13 (dd, *J* = 1.1, 3.6 Hz, 1H), 7.18 (dd, *J* = 1.1, 5.1 Hz, 1H), 7.25–7.31 (m, 3H), 7.37–7.43 (m, 2H) ppm; <sup>13</sup>C{<sup>1</sup>H} NMR (100 MHz, CDCl<sub>3</sub>): δ = 18.7 (s), 18.9 (s), 27.7 (s), 74.3 (s), 81.3 (s), 89.0 (s), 93.3 (s), 123.7 (s), 123.9 (s), 126.0 (s), 126.8 (s), 127.6 (s), 128.2 (s), 131.1 (s), 131.5 (s) ppm; HRMS (ESI): *m/z* = 251.0888 ([*M* + H]<sup>+</sup>, Calcd 251.0889).

**Synthesis of 2b.** According to a similar procedure described for the synthesis of **2a**, **2b** was prepared from **1b**. Compound **2b** was isolated as a yellow solid in 59% yield based on **1b**: *R*<sub>f</sub> = 0.5 (hexane/AcOEt = 20/1); mp 134–137 °C; <sup>1</sup>H NMR (400 MHz, CDCl<sub>3</sub>): δ = 2.33–2.48 (m, 2H), 2.70–2.80 (m, 2H), 2.83–2.93 (m, 1H), 2.95–3.05 (m, 1H), 6.92 (ddd, *J* = 3.8, 5.1 Hz, *J*<sub>H-P</sub> = 0.7 Hz, 1H), 6.98 (dd, *J* = 3.8 Hz, *J*<sub>H-P</sub> = 0.6 Hz, 1H), 7.10–7.14 (m, 1H), 7.15 (ddd, *J* = 1.3, 5.1 Hz, *J*<sub>H-P</sub> = 1.3 Hz, 1H), 7.19–7.28 (m, 5H), 7.43–7.50 (m, 4H) ppm; <sup>13</sup>C{<sup>1</sup>H} NMR (100 MHz, CD<sub>2</sub>Cl<sub>2</sub>): δ = 29.3 (s), 29.7 (s), 30.1 (s), 124.5 (d, *J*<sub>C-P</sub> = 8.3 Hz), 124.8 (d, *J*<sub>C-P</sub> = 1.6 Hz), 126.6 (s), 127.7 (d, *J*<sub>C-P</sub> = 10.6 Hz), 127.9 (s), 128.9 (s), 129.1 (d, *J*<sub>C-P</sub> = 8.4 Hz), 130.1 (d, *J*<sub>C-P</sub> = 1.5 Hz), 131.4 (s), 133.5 (d, *J*<sub>C-P</sub> = 12.9 Hz), 134.0 (d, *J*<sub>C-P</sub> = 19.7 Hz), 136.8 (s), 137.0 (d, *J*<sub>C-P</sub> = 19.0 Hz), 140.6 (d, *J*<sub>C-P</sub> = 23.6 Hz), 154.8 (d, *J*<sub>C-P</sub> = 9.1 Hz), 155.5 (d, *J*<sub>C-P</sub> = 9.1 Hz) ppm; <sup>31</sup>P{<sup>1</sup>H} NMR (162 MHz, CDCl<sub>3</sub>): δ = 37.4 ppm; HRMS (ESI): *m/z* = 359.1013 ([*M* + H]<sup>+</sup>, Calcd 359.1018).

**Synthesis of 10.** To a solution of **2b** (0.362 g, 1.0 mmol) in THF (20 mL) was added a solution of LDA (in THF/PhEt/heptane, *ca.* 1.5 M × 1.0 mL, *ca.* 1.5 mmol) at -78 °C, and the reaction mixture was stirred for 1 h at same temperature. A solution of chlorodiphenylphosphine (0.30 mL, 1.6 mmol) was added to the reaction mixture, and the resulting solution was allowed to warm to room temperature and

stirred for 29 h. After water (20 mL) was added to the mixture, the aqueous layer was separated and extracted with CH<sub>2</sub>Cl<sub>2</sub> (3 × 10 mL). The combined organic extracts were washed with water (20 mL) and brine (20 mL), dried over Na<sub>2</sub>SO<sub>4</sub>, and evaporated to leave an oily residue, which was then chromatographed on silica gel using hexane/CH<sub>2</sub>Cl<sub>2</sub> (10/1 to 5/1) as eluents. Compound **10** was isolated as a yellow solid (0.331 g, 60%) by recrystallization from CH<sub>2</sub>Cl<sub>2</sub>/MeOH: *R<sub>f</sub>* = 0.5 (hexane/AcOEt = 20/1); mp 144–147 °C; <sup>1</sup>H NMR (400 MHz, CDCl<sub>3</sub>): δ = 2.31–2.42 (m, 2H), 2.63–2.83 (m, 3H), 2.93–3.03 (m, 1H), 6.95 (dd, *J* = 3.7 Hz, *J*<sub>H-P</sub> = 0.8 Hz, 1H), 7.07 (ddd, *J* = 3.7 Hz, *J*<sub>H-P</sub> = 0.6, 6.2 Hz, 1H), 7.10–7.14 (m, 1H) 7.18–7.27 (m, 5H), 7.29–7.46 (m, 14H) ppm; <sup>13</sup>C{<sup>1</sup>H} NMR (100 MHz, CD<sub>2</sub>Cl<sub>2</sub>): δ = 29.5 (s), 29.7 (s), 30.1 (s), 125.3 (dd, *J*<sub>C-P</sub> = 8.0, 8.0 Hz) 126.8 (s), 127.8 (d, *J*<sub>C-P</sub> = 10.7 Hz), 128.8 (d, *J*<sub>C-P</sub> = 6.8 Hz), 128.9 (d, *J*<sub>C-P</sub> = 7.6 Hz), 128.9 (s), 129.1 (d, *J*<sub>C-P</sub> = 8.3 Hz), 129.2 (s), 129.3 (s), 130.2 (d, *J*<sub>C-P</sub> = 1.5 Hz), 131.1 (s), 133.3 (d, *J*<sub>C-P</sub> = 13.7 Hz), 133.3 (d, *J*<sub>C-P</sub> = 18.9 Hz), 133.5 (d, *J*<sub>C-P</sub> = 19.8 Hz), 134.1 (d, *J*<sub>C-P</sub> = 19.0 Hz), 136.9 (d, *J*<sub>C-P</sub> = 19.0 Hz), 137.0 (dd, *J*<sub>C-P</sub> = 1.5, 28.8 Hz), 137.5 (s), 137.5 (d, *J*<sub>C-P</sub> = 26.5 Hz), 138.3 (d, *J*<sub>C-P</sub> = 9.1 Hz), 138.4 (d, *J*<sub>C-P</sub> = 8.3 Hz), 147.4 (d, *J*<sub>C-P</sub> = 23.5 Hz), 155.6 (d, *J*<sub>C-P</sub> = 9.1 Hz), 155.9 (d, *J*<sub>C-P</sub> = 9.8 Hz) ppm; <sup>31</sup>P{<sup>1</sup>H} NMR (162 MHz, CDCl<sub>3</sub>): δ = -18.9, 37.2 ppm; HRMS (ESI): *m/z* = 543.1447 ([*M* + *H*]<sup>+</sup>, Calcd 543.1460).

**Synthesis of 11.** To a solution of **10** (0.240 g, 0.44 mmol) in CHCl<sub>3</sub> (8 mL) was added iodomethane (140 μL, 2.2 mmol), and the reaction mixture was stirred for 9 h at room temperature. The resulting mixture was evaporated under reduced pressure to leave a solid residue, which was then chromatographed on silica gel using CH<sub>2</sub>Cl<sub>2</sub>/MeOH (20/1) as eluents. Compound **11** was isolated as a yellow solid (0.137 g, 45%) by recrystallization from CH<sub>2</sub>Cl<sub>2</sub>/hexane: *R<sub>f</sub>* = 0.4 (CH<sub>2</sub>Cl<sub>2</sub>/MeOH = 10/1); mp 122–125 °C; <sup>1</sup>H NMR (400 MHz, CD<sub>2</sub>Cl<sub>2</sub>, 20 mM): δ = 2.37–2.53 (m, 2H), 2.69–2.92 (m, 3H), 3.00 (d, *J*<sub>H-P</sub> = 13.6 Hz, 3H), 3.02–3.12 (m, 1H), 7.16–7.21 (m, 1H), 7.21 (dd, *J* = 4.1 Hz, *J*<sub>H-P</sub> = 2.0 Hz, 1H), 7.24–7.34 (m, 5H), 7.43–7.49 (m, 4H), 7.60 (ddd, *J* = 4.1 Hz, *J*<sub>H-P</sub> = 0.6, 8.4 Hz, 1H), 7.67–7.79 (m, 8H), 7.82–7.88 (m, 2H) ppm, <sup>1</sup>H NMR (400 MHz, CD<sub>3</sub>OD): δ = 2.37–2.54 (m, 2H), 2.69–2.80 (m, 2H), 2.83–2.95 (m, 1H), 2.95 (d, *J*<sub>H-P</sub> = 14.4 Hz, 3H), 3.04–3.14 (m, 1H), 7.14–7.18 (m, 1H), 7.21–7.32 (m, 6H), 7.39–7.47 (m, 4H), 7.63 (ddd, *J* = 4.1 Hz, *J*<sub>H-P</sub> = 0.9, 8.5 Hz, 1H), 7.70–7.81 (m, 8H), 7.85–7.90 (m, 2H) ppm; <sup>13</sup>C{<sup>1</sup>H} NMR (100 MHz, CD<sub>2</sub>Cl<sub>2</sub>): δ = 13.1 (d, *J*<sub>C-P</sub> = 59.1 Hz), 29.7 (s), 30.0 (s), 30.1 (s), 112.9 (d, *J*<sub>C-P</sub> = 105.5 Hz), 112.9 (d, *J*<sub>C-P</sub> = 104.7 Hz), 120.2 (d, *J*<sub>C-P</sub> = 1.6, 91.8 Hz), 126.4 (d, *J*<sub>C-P</sub> = 8.0, 14.0 Hz), 127.7 (s), 128.0 (d, *J*<sub>C-P</sub> = 10.6 Hz), 129.0 (dd, *J*<sub>C-P</sub> = 1.9, 1.9 Hz), 129.1 (d, *J*<sub>C-P</sub> = 1.5 Hz), 129.4 (d, *J*<sub>C-P</sub> = 9.1 Hz), 130.7 (d, *J*<sub>C-P</sub> = 1.5 Hz), 130.8 (d, *J*<sub>C-P</sub> = 13.7 Hz), 130.8 (d,

$J_{C-P} = 12.9$  Hz), 131.7 (d,  $J_{C-P} = 12.2$  Hz), 133.3 (d,  $J_{C-P} = 11.3$  Hz), 134.2 (d,  $J_{C-P} = 20.5$  Hz), 135.8 (d,  $J_{C-P} = 3.1$  Hz), 135.8 (d,  $J_{C-P} = 3.0$  Hz), 136.1 (d,  $J_{C-P} = 19.0$  Hz), 141.4 (s), 143.2 (d,  $J_{C-P} = 9.1$  Hz), 155.1 (dd,  $J_{C-P} = 5.0, 23.2$  Hz), 155.3 (d,  $J_{C-P} = 8.3$  Hz), 160.9 (d,  $J_{C-P} = 10.6$  Hz) ppm;  $^{31}\text{P}\{^1\text{H}\}$  NMR (162 MHz,  $\text{CD}_2\text{Cl}_2$ , 20 mM):  $\delta = 14.6, 38.3$  ppm;  $^{31}\text{P}\{^1\text{H}\}$  NMR (162 MHz,  $\text{CD}_3\text{OD}$ ):  $\delta = 15.4, 38.7$  ppm; HRMS (ESI):  $m/z = 557.1594$  ( $[\text{M} - \text{I}]^+$ , Calcd 557.1616).

**Synthesis of 12.** A mixture of **11** (77 mg, 0.11 mmol),  $\text{NaPF}_6$  (0.376 g, 2.2 mmol),  $\text{CH}_2\text{Cl}_2$  (2 mL), and MeCN (2 mL) was stirred at room temperature. After 4 h, the mixture was washed with water (2 mL).  $\text{NaPF}_6$  (0.381 g, 2.3 mmol) was then added, and the resulting mixture was stirred for 1 h. After addition of  $\text{CH}_2\text{Cl}_2$  (10 mL), the mixture was washed with water ( $3 \times 10$  mL), dried over  $\text{Na}_2\text{SO}_4$ , and evaporated to leave a solid residue, which was then chromatographed on silica gel using  $\text{CH}_2\text{Cl}_2/\text{MeOH}$  (20/1) as eluents. Compound **12** was isolated as a yellow solid (65 mg, 82%) by recrystallization from  $\text{CH}_2\text{Cl}_2/\text{hexane}$ :  $R_f = 0.4$  ( $\text{CH}_2\text{Cl}_2/\text{MeOH} = 10/1$ ); mp 104–107 °C; IR (KBr):  $\nu_{\text{max}} = 838$  (P–F)  $\text{cm}^{-1}$ ;  $^1\text{H}$  NMR (400 MHz,  $\text{CD}_2\text{Cl}_2$ ):  $\delta = 2.37\text{--}2.56$  (m, 2H), 2.67–2.92 (m, 3H), 2.71 (d,  $J_{H-P} = 13.2$  Hz, 3H), 3.02–3.12 (m, 1H), 7.17–7.21 (m, 2H), 7.24–7.35 (m, 5H), 7.40 (ddd,  $J = 4.0$  Hz,  $J_{H-P} = 0.8, 8.4$  Hz, 1H), 7.43–7.49 (m, 4H), 7.60–7.74 (m, 8H), 7.84–7.89 (m, 2H) ppm;  $^1\text{H}$  NMR (400 MHz,  $\text{CD}_3\text{OD}$ ):  $\delta = 2.37\text{--}2.54$  (m, 2H), 2.69–2.80 (m, 2H), 2.85–2.95 (m, 1H), 2.94 (d,  $J_{H-P} = 14.0$  Hz, 3H), 3.05–3.15 (m, 1H), 7.14–7.19 (m, 1H), 7.21–7.32 (m, 6H), 7.39–7.47 (m, 4H), 7.62 (ddd,  $J = 4.1$  Hz,  $J_{H-P} = 0.9, 8.5$  Hz, 1H), 7.70–7.80 (m, 8H), 7.85–7.90 (m, 2H) ppm;  $^{13}\text{C}\{^1\text{H}\}$  NMR (100 MHz,  $\text{CD}_2\text{Cl}_2$ ):  $\delta = 11.7$  (d,  $J_{C-P} = 60.7$  Hz), 29.7 (d,  $J_{C-P} = 1.5$  Hz), 30.0 (s), 30.1 (s), 112.4 (d,  $J_{C-P} = 106.2$  Hz), 112.4 (d,  $J_{C-P} = 105.5$  Hz), 119.9 (dd,  $J_{C-P} = 1.6, 91.0$  Hz), 126.3 (dd,  $J_{C-P} = 8.0, 14.1$  Hz), 127.7 (s), 128.0 (d,  $J_{C-P} = 10.6$  Hz), 128.9 (dd,  $J_{C-P} = 1.9, 1.9$  Hz), 129.1 (s), 129.4 (d,  $J_{C-P} = 8.4$  Hz), 130.7 (d,  $J_{C-P} = 1.5$  Hz), 130.9 (d,  $J_{C-P} = 13.7$  Hz), 130.9 (d,  $J_{C-P} = 12.9$  Hz), 131.7 (d,  $J_{C-P} = 12.1$  Hz), 133.0 (d,  $J_{C-P} = 10.6$  Hz), 134.2 (d,  $J_{C-P} = 19.8$  Hz), 136.0 (d,  $J_{C-P} = 3.1$  Hz), 136.0 (d,  $J_{C-P} = 3.0$  Hz), 136.1 (d,  $J_{C-P} = 18.2$  Hz), 141.6 (s), 142.8 (d,  $J_{C-P} = 9.1$  Hz), 155.3 (d,  $J_{C-P} = 7.6$  Hz), 155.5 (d,  $J_{C-P} = 5.0, 23.9$  Hz), 161.1 (d,  $J_{C-P} = 10.6$  Hz) ppm;  $^{31}\text{P}\{^1\text{H}\}$  NMR (162 MHz,  $\text{CD}_2\text{Cl}_2$ ):  $\delta = -144.5$  (hept,  $J_{P-F} = 711$  Hz), 14.2, 38.2 ppm;  $^{31}\text{P}\{^1\text{H}\}$  NMR (162 MHz,  $\text{CD}_3\text{OD}$ ):  $\delta = -144.6$  (hept,  $J_{P-F} = 708$  Hz), 15.5, 38.6 ppm; HRMS (ESI):  $m/z = 557.1589$  ( $[\text{M} - \text{PF}_6]^+$ , Calcd 557.1616).

**Table S1** Bond lengths and torsion angles of **2a**, **3**, **7**, and **9<sup>2+</sup>** obtained by the DFT method. <sup>a</sup>

---

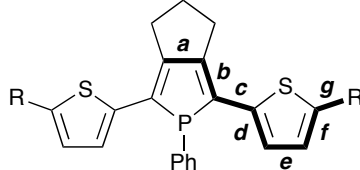

**2a** (R = H)  
**3** (R = BMe<sub>2</sub>)  
**7** (R = PPh<sub>2</sub>)  
**9<sup>2+</sup>** (R = P<sup>+</sup>(Me)Ph<sub>2</sub>)

---

|                           | <b>2a</b> | <b>3</b> | <b>7</b> | <b>9<sup>2+</sup></b> |
|---------------------------|-----------|----------|----------|-----------------------|
| <i>bond lengths</i> (Å)   |           |          |          |                       |
| <i>a</i>                  | 1.452     | 1.447    | 1.451    | 1.448                 |
| <i>b</i>                  | 1.369     | 1.373    | 1.370    | 1.373                 |
| <i>c</i>                  | 1.445     | 1.442    | 1.444    | 1.444                 |
| <i>d</i>                  | 1.383     | 1.393    | 1.385    | 1.388                 |
| <i>e</i>                  | 1.421     | 1.406    | 1.416    | 1.410                 |
| <i>f</i>                  | 1.368     | 1.391    | 1.379    | 1.384                 |
| <i>g</i>                  | –         | 1.544    | 1.833    | 1.784                 |
| <i>torsion angles</i> (°) |           |          |          |                       |
| <i>b-c-d</i>              | 178.0     | 177.8    | 178.8    | 175.9                 |

---

<sup>a</sup> Calculated by the B3LYP/6-31G(d) method.

**Table S2** Optimized geometries of **2a**, **3**, **7**, and **9<sup>2+</sup>** by the B3LYP/6-31G(d) method.

---

| <b>2a</b> | <i>x</i>  | <i>y</i>  | <i>z</i>  |
|-----------|-----------|-----------|-----------|
| C         | -5.245480 | -0.337629 | -0.518740 |
| C         | -4.716382 | 0.832980  | -0.990371 |
| C         | -3.295595 | 0.844230  | -0.975841 |
| C         | -2.726413 | -0.318083 | -0.488250 |
| S         | -4.005713 | -1.454484 | -0.048818 |
| H         | -6.286818 | -0.612790 | -0.418215 |
| H         | -5.320569 | 1.664113  | -1.338039 |
| H         | -2.702132 | 1.688304  | -1.308707 |
| C         | -1.322229 | -0.623839 | -0.338473 |
| C         | -0.725755 | -1.745101 | 0.172492  |
| C         | 0.725754  | -1.745101 | 0.172491  |
| C         | 1.322228  | -0.623840 | -0.338474 |
| P         | 0.000000  | 0.461219  | -1.035936 |
| C         | 0.000001  | 1.952706  | 0.064967  |
| C         | 0.000002  | 3.219640  | -0.535534 |
| C         | 0.000001  | 1.864432  | 1.465946  |
| C         | 0.000002  | 4.378070  | 0.246745  |
| H         | 0.000001  | 3.299742  | -1.620131 |
| C         | 0.000001  | 3.018994  | 2.245732  |
| H         | 0.000000  | 0.887230  | 1.940707  |
| C         | 0.000002  | 4.278318  | 1.637249  |
| H         | 0.000003  | 5.354006  | -0.231602 |
| H         | 0.000001  | 2.939141  | 3.329782  |
| H         | 0.000003  | 5.177217  | 2.248167  |
| C         | 2.726412  | -0.318086 | -0.488254 |
| C         | 3.295595  | 0.844223  | -0.975854 |
| S         | 4.005712  | -1.454491 | -0.048833 |
| C         | 4.716381  | 0.832980  | -0.990366 |
| H         | 2.702131  | 1.688294  | -1.308727 |
| C         | 5.245480  | -0.337620 | -0.518714 |
| H         | 5.320569  | 1.664116  | -1.338027 |
| H         | 6.286817  | -0.612772 | -0.418165 |
| C         | -0.000001 | -3.629121 | 1.475323  |
| H         | -0.000001 | -4.722977 | 1.499569  |
| H         | -0.000001 | -3.280219 | 2.514604  |

|   |           |           |           |
|---|-----------|-----------|-----------|
| C | -1.238224 | -3.047104 | 0.743382  |
| H | -2.094693 | -2.921253 | 1.414317  |
| H | -1.569933 | -3.714627 | -0.065711 |
| C | 1.238223  | -3.047104 | 0.743382  |
| H | 1.569931  | -3.714627 | -0.065712 |
| H | 2.094691  | -2.921255 | 1.414316  |

| <b>3</b> | <i>x</i>  | <i>y</i>  | <i>z</i>  |
|----------|-----------|-----------|-----------|
| C        | 5.274800  | -0.398347 | -0.183354 |
| C        | 4.694260  | -1.648523 | 0.006239  |
| C        | 3.288625  | -1.653986 | 0.026565  |
| C        | 2.724255  | -0.393689 | -0.158928 |
| S        | 3.996016  | 0.796806  | -0.350204 |
| H        | 5.298265  | -2.539812 | 0.141827  |
| H        | 2.691692  | -2.546259 | 0.179602  |
| C        | 1.320258  | -0.067000 | -0.196866 |
| C        | 0.723587  | 1.161549  | -0.335782 |
| C        | -0.723678 | 1.161550  | -0.335720 |
| C        | -1.320343 | -0.066994 | -0.196723 |
| P        | -0.000051 | -1.355511 | -0.242866 |
| C        | 0.000060  | -2.095408 | 1.455199  |
| C        | 0.000120  | -3.493336 | 1.564887  |
| C        | 0.000084  | -1.320434 | 2.625720  |
| C        | 0.000208  | -4.107972 | 2.820165  |
| H        | 0.000098  | -4.102876 | 0.664339  |
| C        | 0.000171  | -1.933607 | 3.876849  |
| H        | 0.000035  | -0.236481 | 2.552638  |
| C        | 0.000234  | -3.328562 | 3.976119  |
| H        | 0.000255  | -5.192362 | 2.891509  |
| H        | 0.000190  | -1.324544 | 4.777071  |
| H        | 0.000302  | -3.803722 | 4.953487  |
| C        | -2.724345 | -0.393653 | -0.158623 |
| C        | -3.288727 | -1.653875 | 0.027330  |
| S        | -3.996094 | 0.796798  | -0.350272 |
| C        | -4.694363 | -1.648396 | 0.007057  |
| H        | -2.691804 | -2.546102 | 0.180676  |
| C        | -5.274893 | -0.398282 | -0.182969 |

|   |            |           |           |
|---|------------|-----------|-----------|
| H | -5.298374  | -2.539630 | 0.142976  |
| C | -0.000041  | 3.446792  | -0.183941 |
| H | -0.000061  | 4.395549  | -0.728349 |
| H | -0.000003  | 3.684978  | 0.886063  |
| C | 1.238093   | 2.570566  | -0.510638 |
| H | 2.095038   | 2.801553  | 0.130576  |
| H | 1.573768   | 2.726614  | -1.546363 |
| C | -1.238196  | 2.570564  | -0.510550 |
| H | -1.573929  | 2.726604  | -1.546257 |
| H | -2.095107  | 2.801549  | 0.130711  |
| B | 6.771686   | -0.022811 | -0.233528 |
| B | -6.771784  | -0.022771 | -0.233300 |
| C | 7.818269   | -1.196679 | -0.452372 |
| C | 7.753788   | -2.04904  | -1.584424 |
| C | 8.852066   | -1.436052 | 0.496847  |
| C | 8.690010   | -3.080265 | -1.744925 |
| C | 9.749183   | -2.489046 | 0.311587  |
| C | 9.691487   | -3.325319 | -0.808263 |
| H | 8.630975   | -3.707654 | -2.633160 |
| H | 10.520998  | -2.659478 | 1.060627  |
| C | 7.191603   | 1.500527  | -0.075782 |
| C | 6.881548   | 2.240966  | 1.092767  |
| C | 7.872904   | 2.180037  | -1.126566 |
| C | 7.233345   | 3.595401  | 1.186174  |
| C | 8.194720   | 3.531284  | -0.998054 |
| C | 7.883173   | 4.264267  | 0.153077  |
| H | 6.992893   | 4.136269  | 2.100611  |
| H | 8.704382   | 4.029898  | -1.821142 |
| C | -7.818334  | -1.196751 | -0.451714 |
| C | -8.852114  | -1.435842 | 0.497593  |
| C | -7.753822  | -2.049511 | -1.583463 |
| C | -9.749196  | -2.488930 | 0.312708  |
| C | -8.690003  | -3.080831 | -1.743594 |
| C | -9.691473  | -3.325593 | -0.806849 |
| H | -10.521000 | -2.659124 | 1.061815  |
| H | -8.630946  | -3.708529 | -2.631610 |
| C | -7.191693  | 1.500653  | -0.076322 |



|   |           |           |           |
|---|-----------|-----------|-----------|
| C | -7.872739 | 2.179680  | -1.127580 |
| C | -6.881764 | 2.241685  | 1.091895  |
| C | -8.194427 | 3.531035  | -0.999844 |
| C | -7.233396 | 3.596216  | 1.184501  |
| C | -7.882980 | 4.264602  | 0.150937  |
| H | -8.703882 | 4.029266  | -1.823292 |
| H | -6.993018 | 4.137555  | 2.098677  |
| C | -8.231607 | 1.486075  | -2.425744 |
| H | -7.336849 | 1.214423  | -3.000417 |
| H | -8.796132 | 0.564433  | -2.255535 |
| H | -8.836240 | 2.141105  | -3.061237 |
| C | -6.242501 | 1.623715  | 2.321855  |
| H | -5.410981 | 2.240162  | 2.683383  |
| H | -6.971024 | 1.557772  | 3.140965  |
| H | -5.856398 | 0.618844  | 2.143704  |
| C | -8.998485 | -0.593238 | 1.748262  |
| H | -8.103507 | -0.641670 | 2.379953  |
| H | -9.165119 | 0.462141  | 1.509957  |
| H | -9.842997 | -0.939755 | 2.352638  |
| C | -6.716963 | -1.896566 | -2.683363 |
| H | -6.304510 | -0.887854 | -2.745938 |
| H | -5.868201 | -2.575242 | -2.532651 |
| H | -7.156120 | -2.140908 | -3.657326 |
| C | 8.231942  | 1.487064  | -2.425019 |
| H | 8.796459  | 0.565347  | -2.255181 |
| H | 7.337258  | 1.215673  | -2.999932 |
| H | 8.836646  | 2.142407  | -3.060122 |
| C | 6.241841  | 1.622482  | 2.322247  |
| H | 6.969687  | 1.557496  | 3.142029  |
| H | 5.409295  | 2.238059  | 2.682913  |
| H | 5.856979  | 0.617170  | 2.143909  |
| C | 6.716905  | -1.895731 | -2.684249 |
| H | 5.868006  | -2.574248 | -2.533601 |
| H | 6.304659  | -0.886920 | -2.746646 |
| H | 7.155965  | -2.140008 | -3.658270 |
| C | 8.998489  | -0.593823 | 1.747768  |
| H | 9.165781  | 0.461524  | 1.509765  |

|   |            |           |           |
|---|------------|-----------|-----------|
| H | 8.103301   | -0.641894 | 2.379178  |
| H | 9.842632   | -0.940943 | 2.352315  |
| C | -10.694089 | -4.439473 | -0.995529 |
| H | -10.755560 | -5.078054 | -0.105860 |
| H | -11.702367 | -4.043747 | -1.174793 |
| H | -10.43163  | -5.074720 | -1.847713 |
| C | -8.234770  | 5.729904  | 0.255111  |
| H | -7.614217  | 6.338213  | -0.416159 |
| H | -9.279646  | 5.912216  | -0.023632 |
| H | -8.086678  | 6.105821  | 1.272606  |
| C | 8.235113   | 5.729473  | 0.258091  |
| H | 9.279924   | 5.911876  | -0.020825 |
| H | 7.614421   | 6.338260  | -0.412617 |
| H | 8.087326   | 6.104759  | 1.275864  |
| C | 10.694123  | -4.439119 | -0.997307 |
| H | 11.702459  | -4.043322 | -1.176074 |
| H | 10.755336  | -5.078206 | -0.107981 |
| H | 10.431870  | -5.073883 | -1.849914 |

|          |           |           |           |
|----------|-----------|-----------|-----------|
| <b>7</b> | <i>x</i>  | <i>y</i>  | <i>z</i>  |
| C        | -5.267278 | 0.213741  | -0.761168 |
| C        | -4.709603 | 1.215246  | 0.004900  |
| C        | -3.293161 | 1.216251  | 0.008163  |
| C        | -2.724787 | 0.210829  | -0.756125 |
| S        | -4.003336 | -0.733505 | -1.516776 |
| H        | -5.310218 | 1.936471  | 0.548052  |
| H        | -2.700061 | 1.933753  | 0.564626  |
| C        | -1.321294 | -0.069493 | -0.945758 |
| C        | -0.725275 | -1.064766 | -1.674583 |
| C        | 0.725253  | -1.064787 | -1.674567 |
| C        | 1.321285  | -0.069530 | -0.945730 |
| P        | 0.000004  | 1.068012  | -0.335963 |
| C        | -0.000016 | 0.829958  | 1.502155  |
| C        | -0.000007 | 1.970866  | 2.317039  |
| C        | -0.000040 | -0.437092 | 2.106468  |
| C        | -0.000021 | 1.850914  | 3.709621  |
| H        | 0.000012  | 2.957544  | 1.859718  |

|   |           |           |           |
|---|-----------|-----------|-----------|
| C | -0.000054 | -0.556807 | 3.494581  |
| H | -0.000048 | -1.327295 | 1.483740  |
| C | -0.000045 | 0.587408  | 4.298897  |
| H | -0.000013 | 2.743617  | 4.329553  |
| H | -0.000073 | -1.542884 | 3.952030  |
| H | -0.000056 | 0.491024  | 5.381471  |
| C | 2.724780  | 0.210754  | -0.756066 |
| C | 3.293164  | 1.216175  | 0.008216  |
| S | 4.003322  | -0.733664 | -1.516626 |
| C | 4.709606  | 1.215157  | 0.004953  |
| H | 2.700071  | 1.933705  | 0.564648  |
| C | 5.267272  | 0.213647  | -0.761114 |
| H | 5.310227  | 1.936398  | 0.548078  |
| C | -0.000030 | -3.121448 | -2.682040 |
| H | -0.000027 | -3.677481 | -3.624188 |
| H | -0.000050 | -3.856896 | -1.869140 |
| C | -1.238089 | -2.198284 | -2.532126 |
| H | -2.095366 | -2.721434 | -2.095748 |
| H | -1.568694 | -1.816646 | -3.509438 |
| C | 1.238053  | -2.198321 | -2.532098 |
| H | 1.568693  | -1.816692 | -3.509402 |
| H | 2.095305  | -2.721496 | -2.095699 |
| C | -7.841383 | 1.380501  | -0.557092 |
| C | -8.025891 | 2.405085  | -1.500091 |
| C | -8.310187 | 1.576143  | 0.750425  |
| C | -8.644609 | 3.602424  | -1.141200 |
| H | -7.684439 | 2.260795  | -2.522461 |
| C | -8.938548 | 2.771372  | 1.106859  |
| H | -8.189147 | 0.791866  | 1.491593  |
| C | -9.104376 | 3.787504  | 0.164390  |
| H | -8.776050 | 4.386188  | -1.882709 |
| H | -9.298508 | 2.907533  | 2.123595  |
| H | -9.595003 | 4.716238  | 0.443677  |
| C | -7.471831 | -1.406947 | 0.152772  |
| C | -6.715473 | -1.660071 | 1.306722  |
| C | -8.640173 | -2.155665 | -0.065273 |
| C | -7.124640 | -2.630088 | 2.224201  |

|                       |           |           |           |
|-----------------------|-----------|-----------|-----------|
| H                     | -5.802385 | -1.099150 | 1.484344  |
| C                     | -9.055179 | -3.116065 | 0.857075  |
| H                     | -9.225358 | -1.987477 | -0.966695 |
| C                     | -8.295988 | -3.356970 | 2.004120  |
| H                     | -6.526699 | -2.816743 | 3.112764  |
| H                     | -9.964088 | -3.683672 | 0.674929  |
| H                     | -8.612132 | -4.112078 | 2.719086  |
| C                     | 7.841364  | 1.380467  | -0.557222 |
| C                     | 8.310212  | 1.576230  | 0.750261  |
| C                     | 8.025820  | 2.404973  | -1.500315 |
| C                     | 8.938566  | 2.771500  | 1.106570  |
| H                     | 8.189213  | 0.792014  | 1.491501  |
| C                     | 8.644529  | 3.602354  | -1.141550 |
| H                     | 7.684333  | 2.260590  | -2.522661 |
| C                     | 9.104340  | 3.787554  | 0.164008  |
| H                     | 9.298560  | 2.907755  | 2.123282  |
| H                     | 8.775930  | 4.386058  | -1.883130 |
| H                     | 9.594962  | 4.716321  | 0.443198  |
| C                     | 7.471875  | -1.406922 | 0.152903  |
| C                     | 8.640207  | -2.155663 | -0.065122 |
| C                     | 6.715567  | -1.659933 | 1.306910  |
| C                     | 9.055251  | -3.115974 | 0.857301  |
| H                     | 9.225353  | -1.987562 | -0.966585 |
| C                     | 7.124772  | -2.629861 | 2.224464  |
| H                     | 5.802488  | -1.098992 | 1.484517  |
| C                     | 8.296110  | -3.356767 | 2.004403  |
| H                     | 9.964151  | -3.683600 | 0.675172  |
| H                     | 6.526870  | -2.816429 | 3.113072  |
| H                     | 8.612284  | -4.111806 | 2.719429  |
| P                     | -7.016074 | -0.170570 | -1.151521 |
| P                     | 7.016062  | -0.170670 | -1.151489 |
| <b>9<sup>2+</sup></b> | <i>x</i>  | <i>y</i>  | <i>z</i>  |
| C                     | -5.241851 | 0.156826  | -0.596044 |
| C                     | -4.704304 | 1.285738  | -0.003107 |
| C                     | -3.296434 | 1.264067  | 0.066317  |
| C                     | -2.719538 | 0.119406  | -0.467393 |

|   |           |           |           |
|---|-----------|-----------|-----------|
| S | -3.975849 | -0.955769 | -1.073632 |
| H | -5.309221 | 2.106803  | 0.365048  |
| H | -2.711923 | 2.065789  | 0.501565  |
| C | -1.313747 | -0.195659 | -0.566256 |
| C | -0.723886 | -1.349952 | -1.018903 |
| C | 0.723883  | -1.349955 | -1.018894 |
| C | 1.313745  | -0.195666 | -0.566240 |
| P | 0.000001  | 1.068330  | -0.294149 |
| C | -0.000010 | 1.432706  | 1.514775  |
| C | 0.000009  | 2.781301  | 1.905287  |
| C | -0.000037 | 0.431608  | 2.500757  |
| C | 0.000001  | 3.124370  | 3.260211  |
| H | 0.000029  | 3.563568  | 1.149933  |
| C | -0.000044 | 0.777342  | 3.850412  |
| H | -0.000052 | -0.61538  | 2.209896  |
| C | -0.000025 | 2.123533  | 4.231375  |
| H | 0.000015  | 4.170323  | 3.553101  |
| H | -0.000065 | -0.001348 | 4.608100  |
| H | -0.000031 | 2.388782  | 5.284711  |
| C | 2.719536  | 0.119391  | -0.467358 |
| C | 3.296432  | 1.264047  | 0.066362  |
| S | 3.975849  | -0.955795 | -1.073571 |
| C | 4.704302  | 1.285719  | -0.003061 |
| H | 2.711920  | 2.065771  | 0.501607  |
| C | 5.241849  | 0.156814  | -0.596012 |
| H | 5.309218  | 2.106786  | 0.365090  |
| C | -0.000004 | -3.594436 | -1.483757 |
| H | -0.000001 | -4.357280 | -2.265971 |
| H | -0.000011 | -4.113678 | -0.519453 |
| C | -1.237515 | -2.661097 | -1.563509 |
| H | -2.091761 | -3.059778 | -1.005473 |
| H | -1.570238 | -2.533788 | -2.604165 |
| C | 1.237512  | -2.661103 | -1.563495 |
| H | 1.570248  | -2.533795 | -2.604146 |
| H | 2.091750  | -3.059788 | -1.005448 |
| C | -7.908957 | 1.346456  | -0.666047 |
| C | -7.708703 | 2.389962  | -1.589139 |

|   |            |           |           |
|---|------------|-----------|-----------|
| C | -8.839837  | 1.495440  | 0.374183  |
| C | -8.439841  | 3.568556  | -1.467773 |
| H | -6.985679  | 2.291010  | -2.394120 |
| C | -9.565950  | 2.681641  | 0.485811  |
| H | -9.001753  | 0.694676  | 1.088121  |
| C | -9.368627  | 3.713717  | -0.432427 |
| H | -8.288217  | 4.371990  | -2.181933 |
| H | -10.287102 | 2.795364  | 1.289171  |
| H | -9.939188  | 4.633339  | -0.344059 |
| C | -7.564617  | -1.449183 | 0.310815  |
| C | -6.861920  | -1.691384 | 1.502163  |
| C | -8.746201  | -2.160404 | 0.033857  |
| C | -7.338780  | -2.640308 | 2.405893  |
| H | -5.948780  | -1.145967 | 1.719779  |
| C | -9.213153  | -3.106499 | 0.943649  |
| H | -9.307398  | -1.981194 | -0.878501 |
| C | -8.510126  | -3.347146 | 2.127293  |
| H | -6.793851  | -2.828025 | 3.325874  |
| H | -10.123861 | -3.656344 | 0.727564  |
| H | -8.877217  | -4.086807 | 2.832415  |
| C | 7.908944   | 1.346466  | -0.666056 |
| C | 8.839837   | 1.495460  | 0.374160  |
| C | 7.708670   | 2.389968  | -1.589149 |
| C | 9.565943   | 2.681667  | 0.485776  |
| H | 9.001770   | 0.694699  | 1.088097  |
| C | 8.439801   | 3.568569  | -1.467795 |
| H | 6.985635   | 2.291009  | -2.394119 |
| C | 9.368599   | 3.713739  | -0.432462 |
| H | 10.287105  | 2.795397  | 1.289126  |
| H | 8.288160   | 4.372000  | -2.181955 |
| H | 9.939154   | 4.633365  | -0.344104 |
| C | 7.564642   | -1.449174 | 0.310814  |
| C | 8.746230   | -2.160383 | 0.033841  |
| C | 6.861963   | -1.691382 | 1.502171  |
| C | 9.213203   | -3.106473 | 0.943627  |
| H | 9.307412   | -1.981168 | -0.878525 |
| C | 7.338845   | -2.640301 | 2.405895  |

|   |           |           |           |
|---|-----------|-----------|-----------|
| H | 5.948821  | -1.145973 | 1.719799  |
| C | 8.510194  | -3.347127 | 2.127280  |
| H | 10.123914 | -3.656309 | 0.727530  |
| H | 6.793930  | -2.828023 | 3.325884  |
| H | 8.877302  | -4.086784 | 2.832397  |
| P | -6.973447 | -0.190860 | -0.847433 |
| P | 6.973444  | -0.190858 | -0.847427 |
| C | -7.187970 | -0.823748 | -2.547799 |
| H | -6.819598 | -0.082874 | -3.262090 |
| H | -6.626323 | -1.754085 | -2.672485 |
| H | -8.245632 | -1.012912 | -2.748413 |
| C | 7.187948  | -0.823747 | -2.547795 |
| H | 6.626305  | -1.754089 | -2.672471 |
| H | 6.819560  | -0.082877 | -3.262082 |
| H | 8.245608  | -1.012904 | -2.748424 |

---

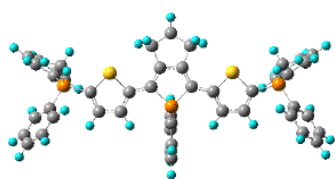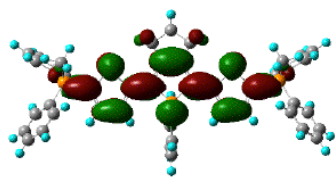

LUMO

-6.59

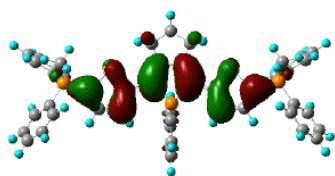

HOMO

-9.60

**Fig. S1** Optimized structure and Kohn Sham diagrams of the HOMO and LUMO of  $9^{2+}$  calculated by the DFT method [B3LYP/6-31G(d)].



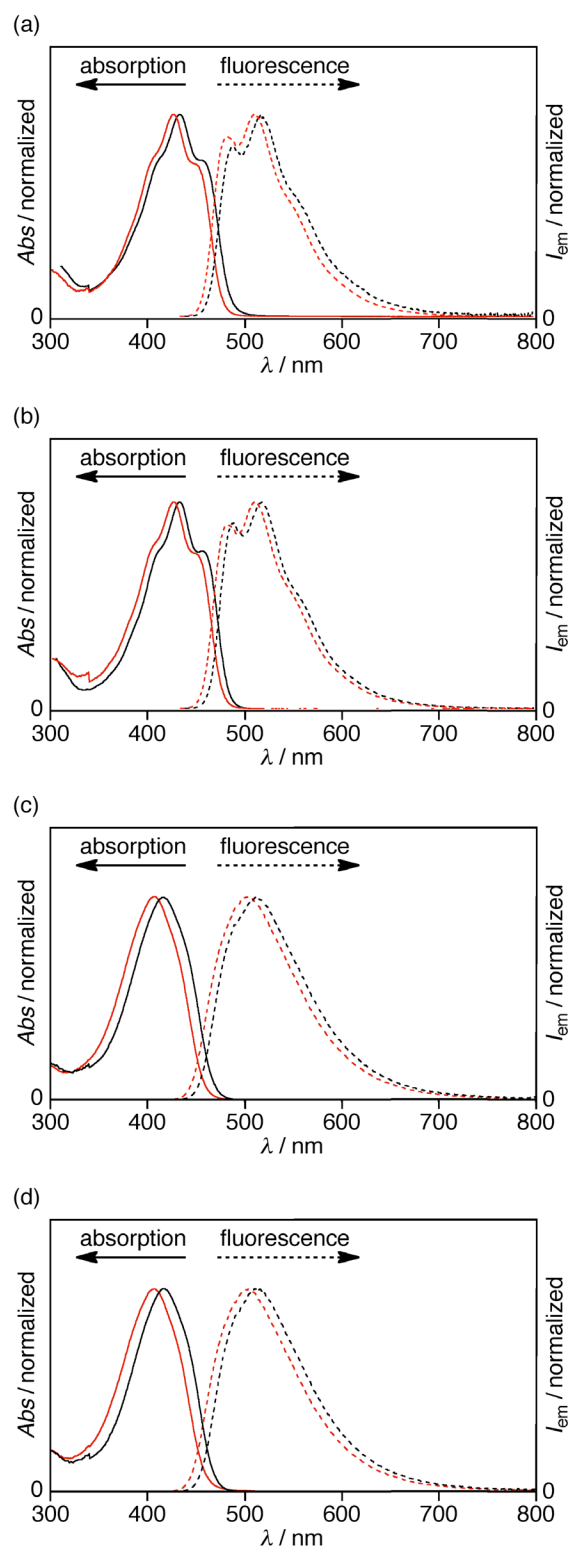

**Fig. S2** UV-vis absorption (solid lines) and fluorescence spectra (dotted lines) of (a) **8**, (b) **9**, (c) **11**, and (d) **12** in  $\text{CH}_2\text{Cl}_2$  (black) and in MeOH (red).  $\lambda_{\text{ex}}$  = absorption maxima.

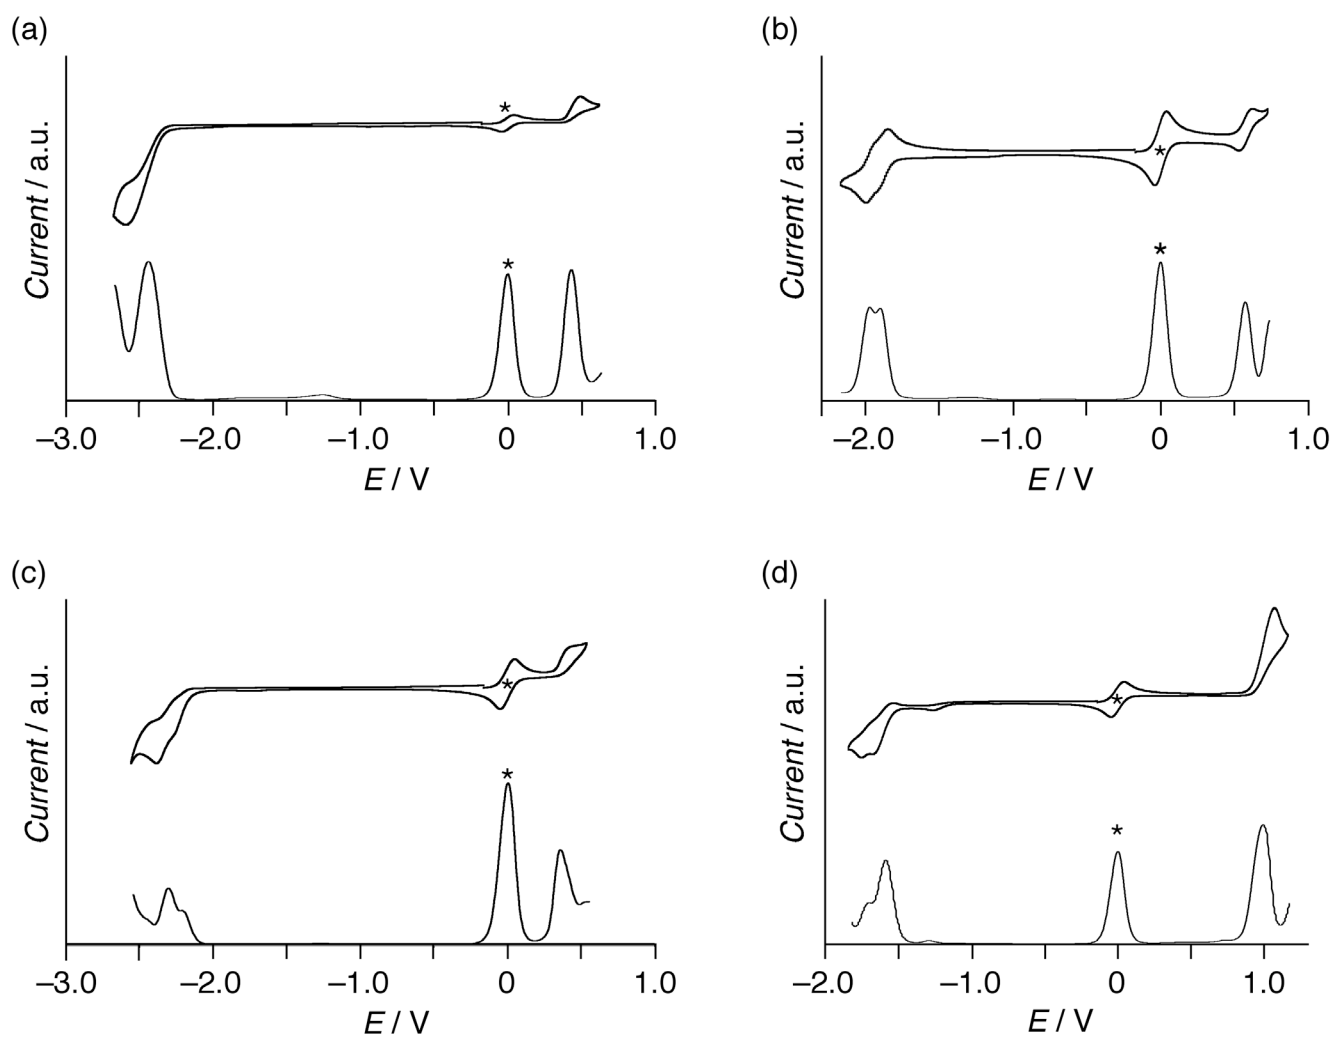

**Fig. S3** Cyclic (upper) and differential pulse voltammograms (lower) of (a) **2a**, (b) **3**, (c) **7**, and (d) **9**. Measured in CH<sub>2</sub>Cl<sub>2</sub> with 0.1 M Bu<sub>4</sub>NPF<sub>6</sub> as a supporting electrolyte; Ag/Ag<sup>+</sup> [AgNO<sub>3</sub> (MeCN)] as a reference electrode; scan rate 60 mV s<sup>-1</sup>. Asterisk (\*) indicates Fc/Fc<sup>+</sup>.

$^1\text{H}$  and  $^{13}\text{C}\{^1\text{H}\}$  NMR Charts (Figures S4–S20) Asterisks (\*) indicate the residual solvents.

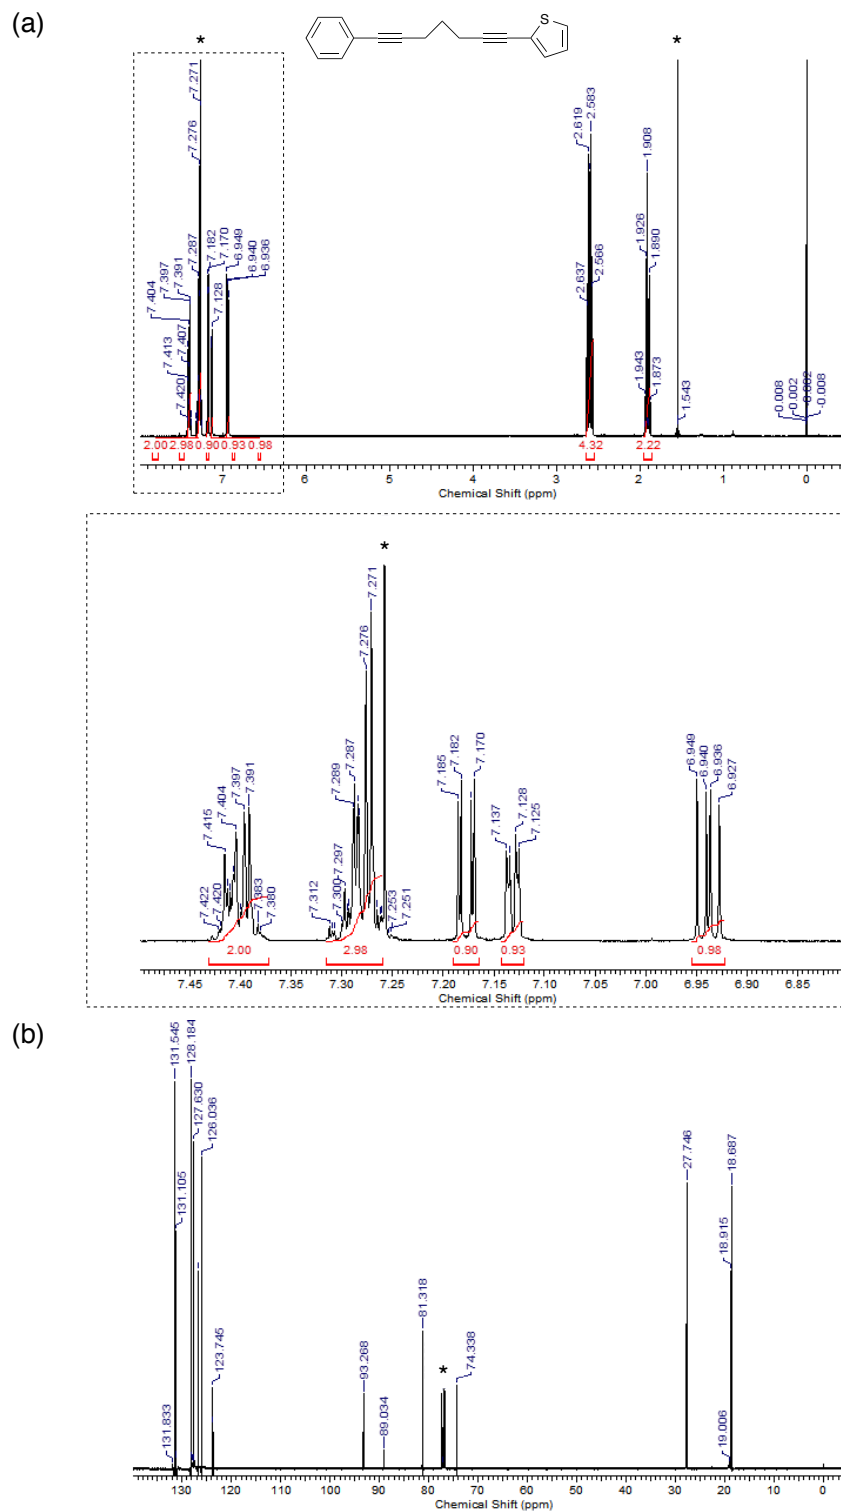

Fig. S4 (a)  $^1\text{H}$  NMR and (b)  $^{13}\text{C}\{^1\text{H}\}$  NMR spectra of **1b** in  $\text{CDCl}_3$ .

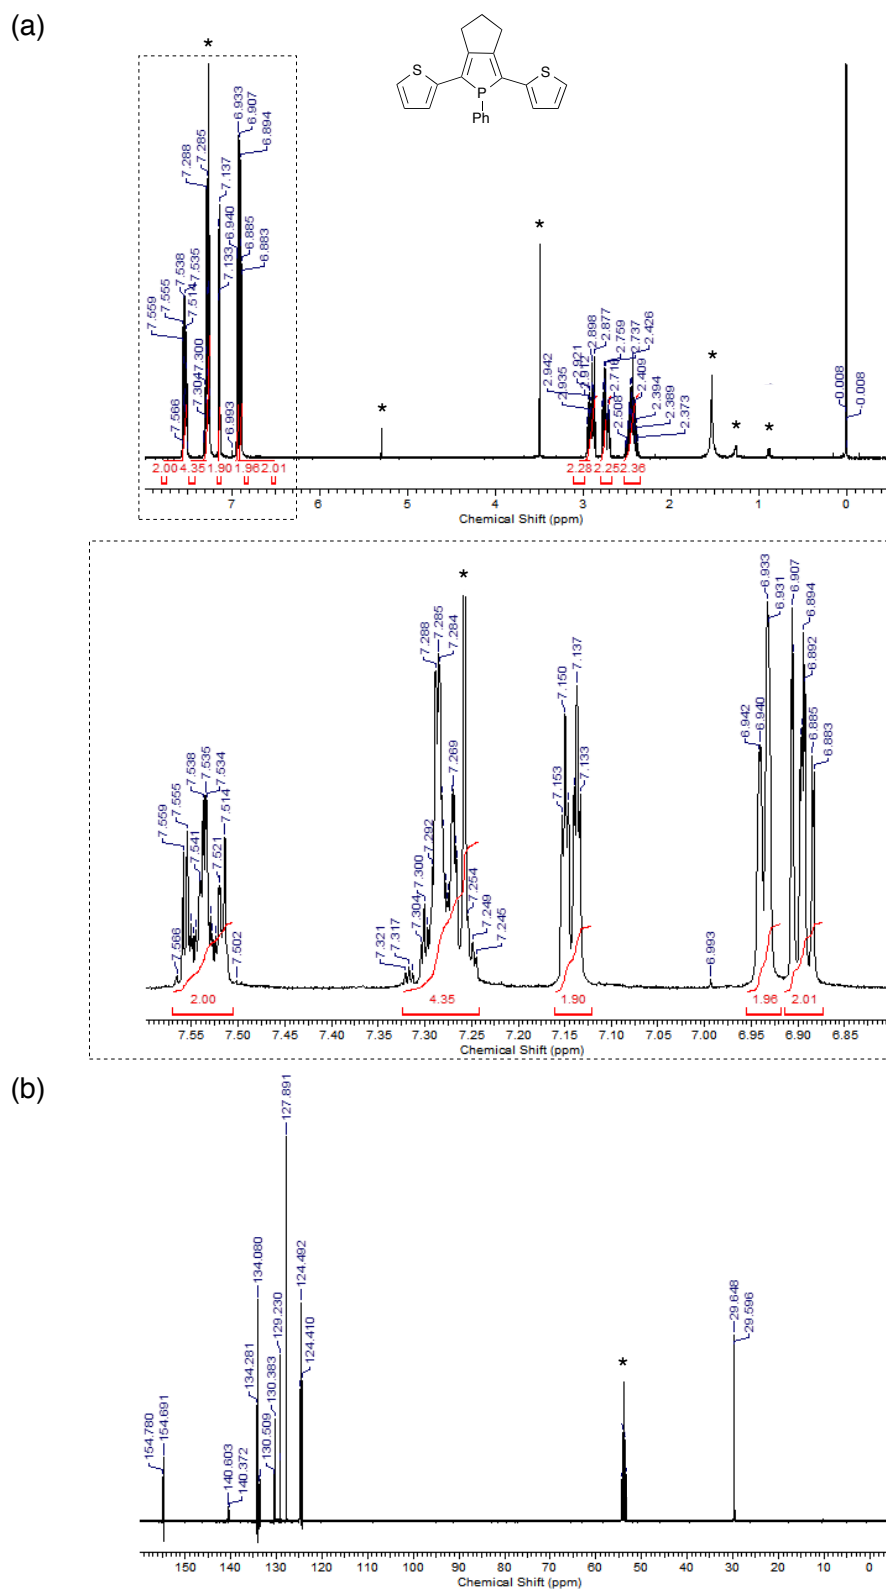

**Fig. S5** (a)  $^1\text{H}$  NMR (in  $\text{CDCl}_3$ ) and (b)  $^{13}\text{C}\{^1\text{H}\}$  NMR spectra (in  $\text{CD}_2\text{Cl}_2$ ) of **2a**.

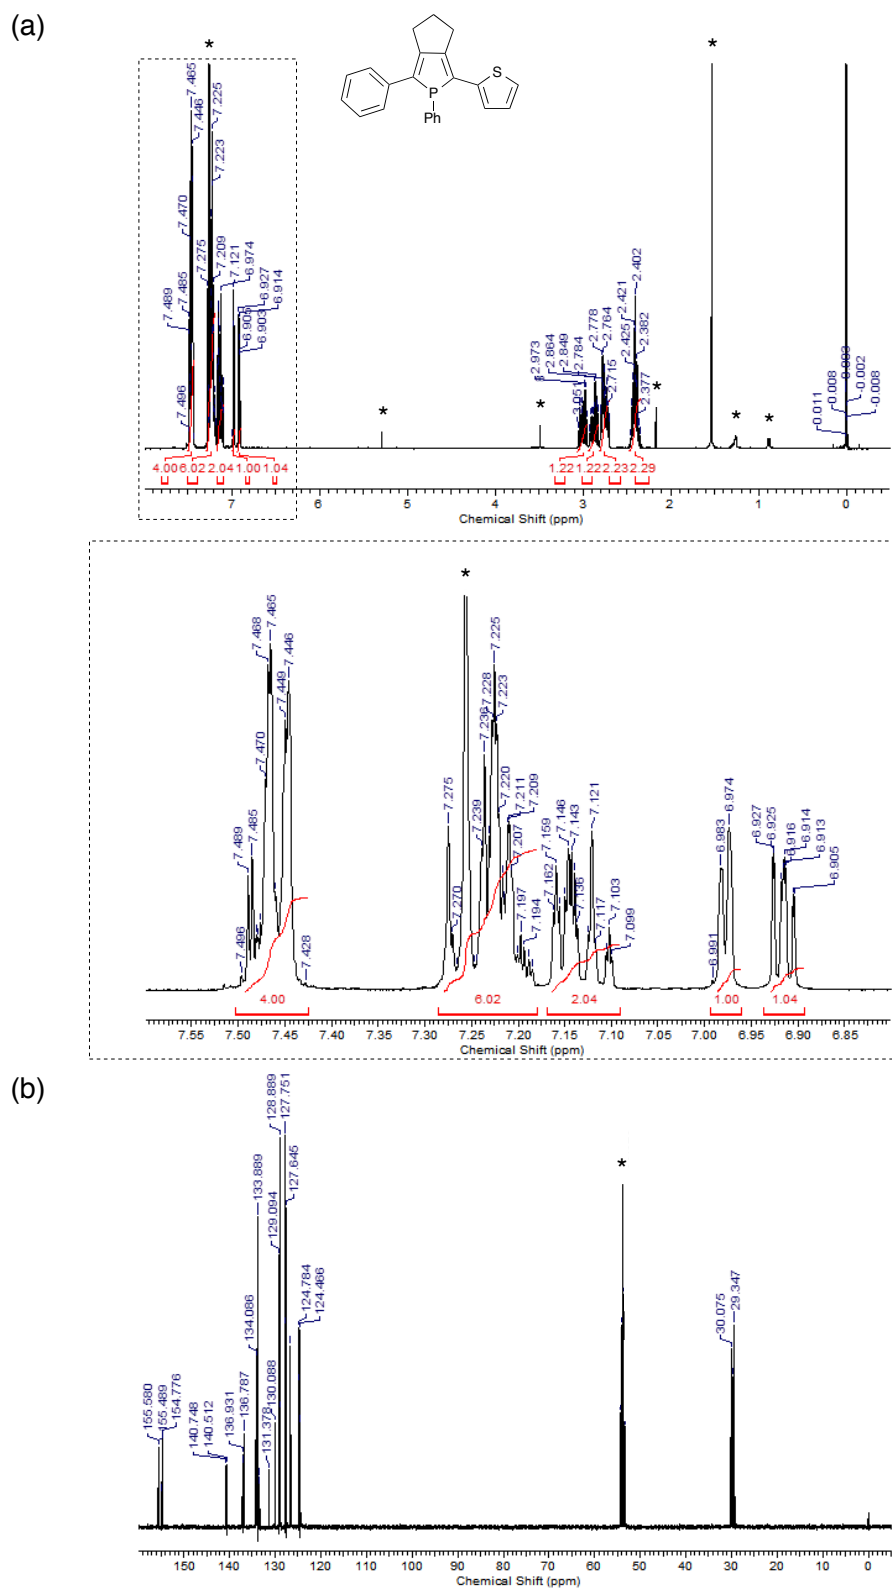

**Fig. S6** (a) <sup>1</sup>H NMR (in CDCl<sub>3</sub>) and (b) <sup>13</sup>C{<sup>1</sup>H} NMR spectra (in CD<sub>2</sub>Cl<sub>2</sub>) of **2b**.

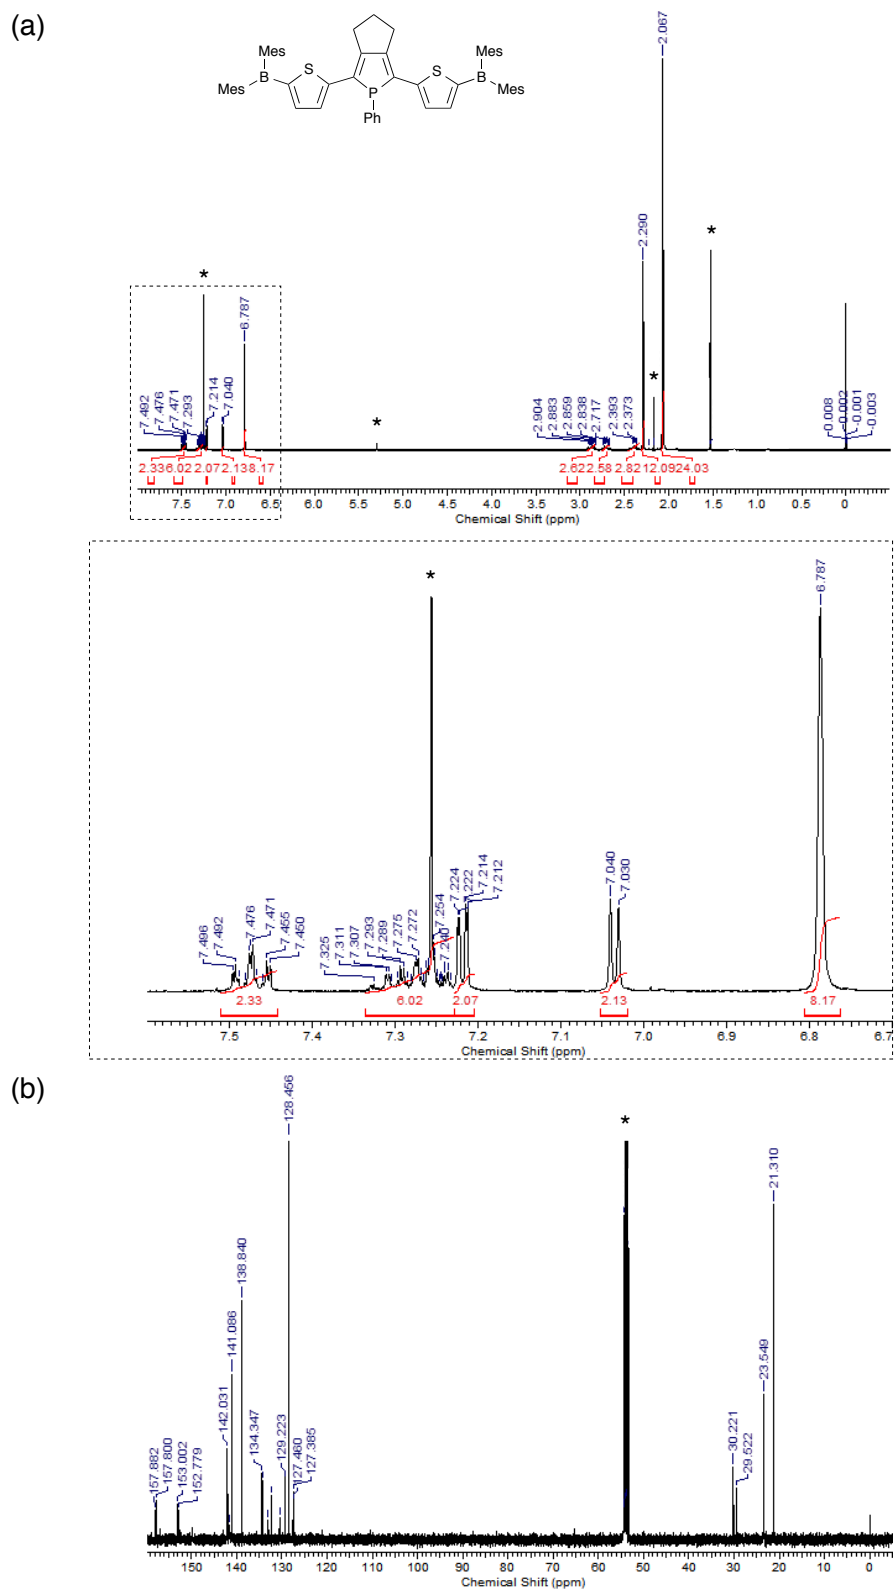

Fig. S7 (a)  $^1\text{H}$  NMR (in  $\text{CDCl}_3$ ) and (b)  $^{13}\text{C}\{^1\text{H}\}$  NMR spectra (in  $\text{CD}_2\text{Cl}_2$ ) of **3**.

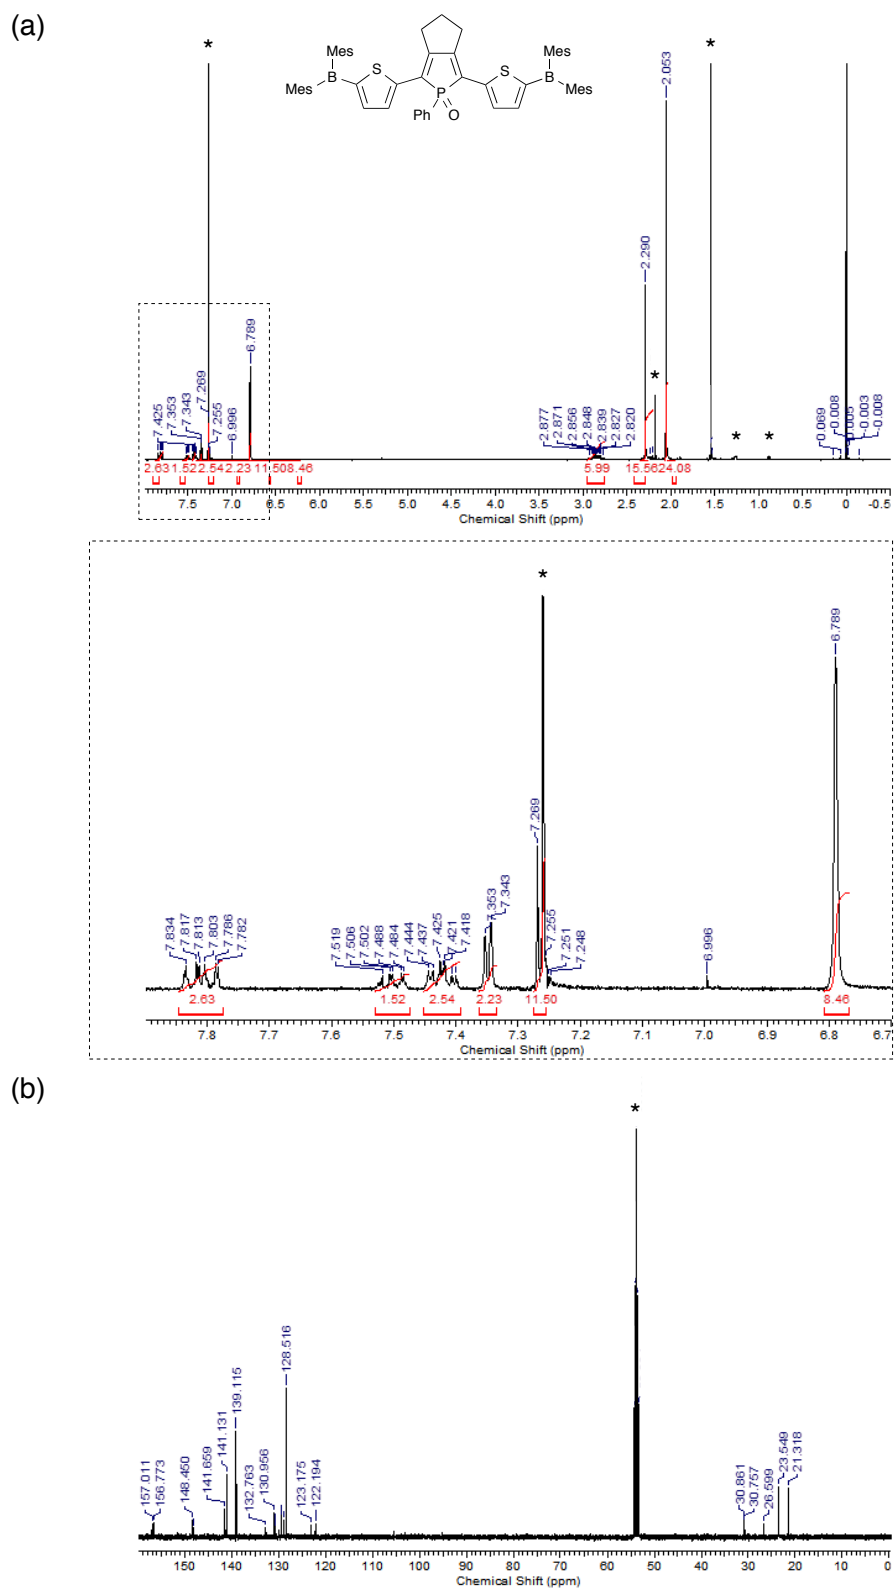

**Fig. S8** (a)  $^1\text{H}$  NMR (in  $\text{CDCl}_3$ ) and (b)  $^{13}\text{C}\{^1\text{H}\}$  NMR spectra (in  $\text{CD}_2\text{Cl}_2$ ) of 4.

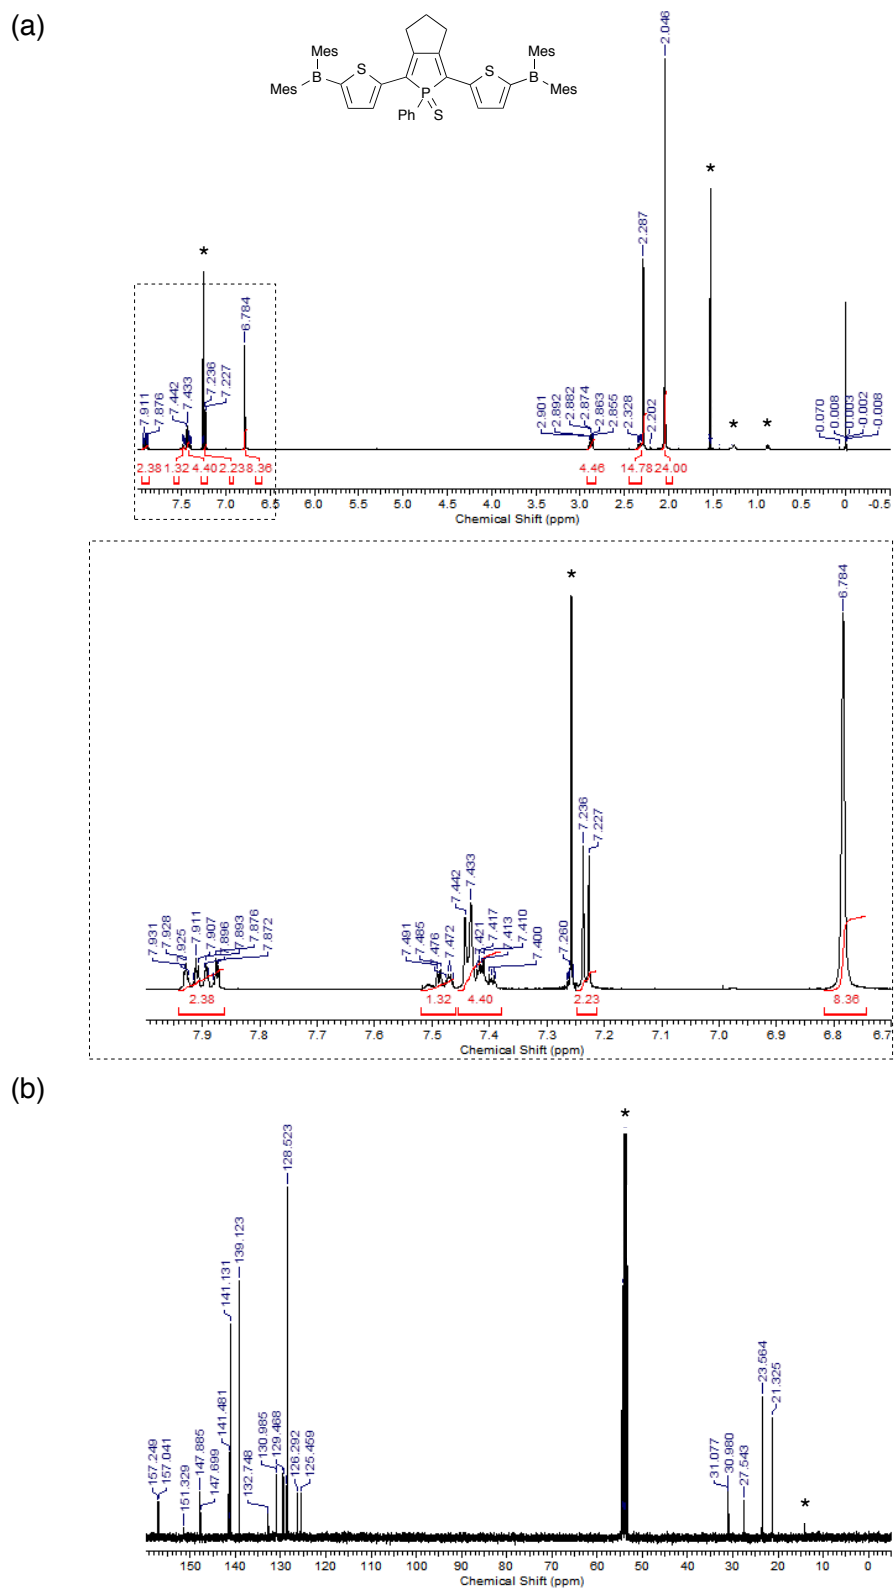

**Fig. S9** (a)  $^1\text{H}$  NMR (in  $\text{CDCl}_3$ ) and (b)  $^{13}\text{C}\{^1\text{H}\}$  NMR spectra (in  $\text{CD}_2\text{Cl}_2$ ) of **5**.



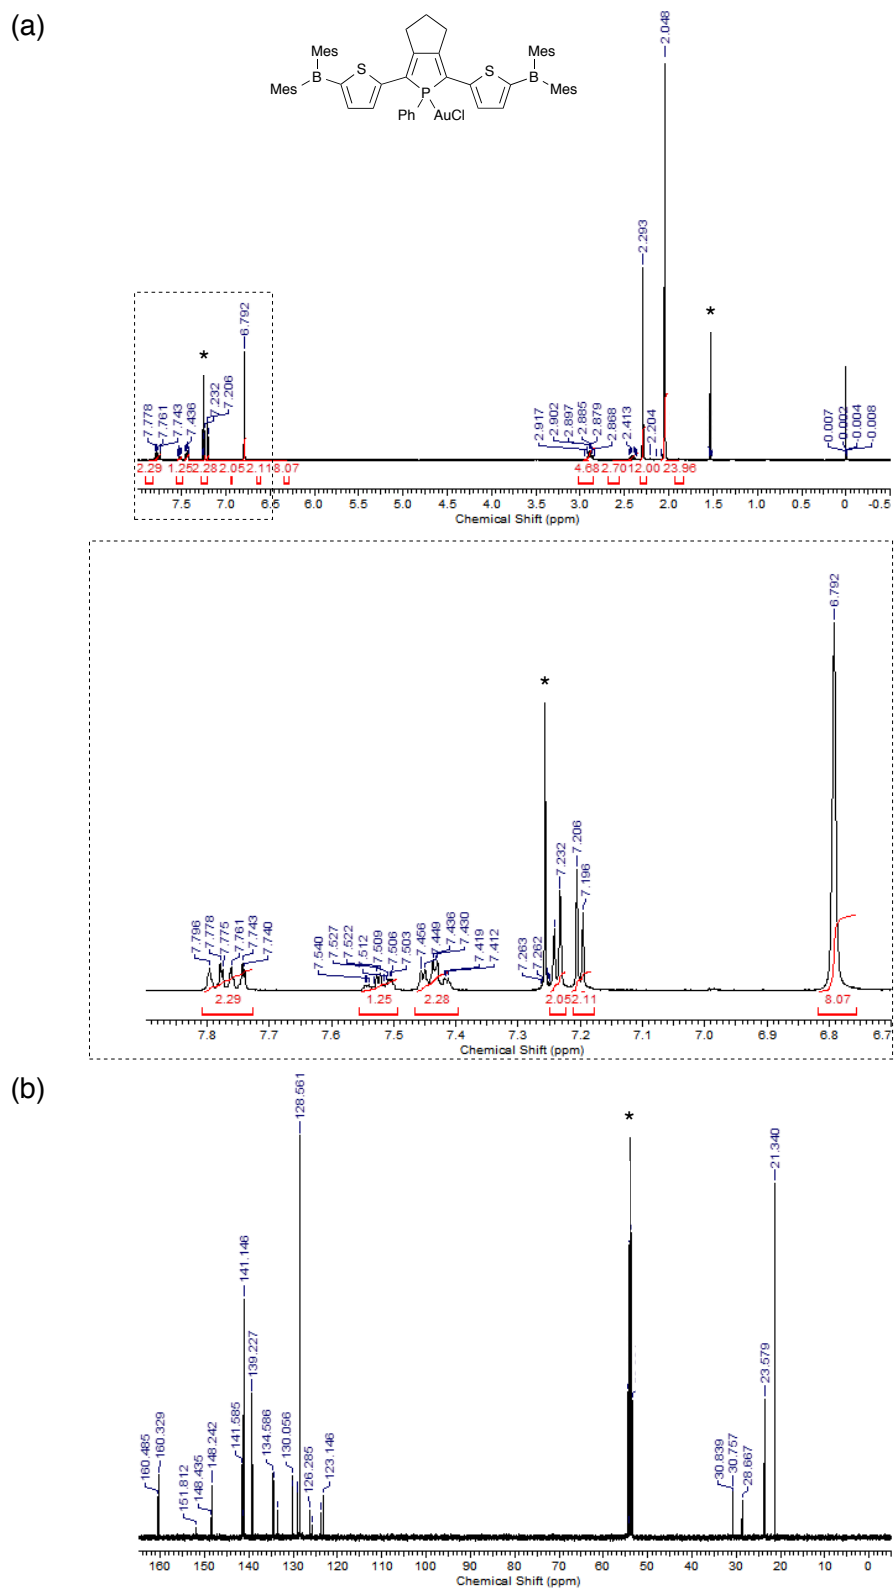

**Fig. S10** (a)  $^1\text{H}$  NMR (in  $\text{CDCl}_3$ ) and (b)  $^{13}\text{C}\{^1\text{H}\}$  NMR spectra (in  $\text{CD}_2\text{Cl}_2$ ) of **6**.

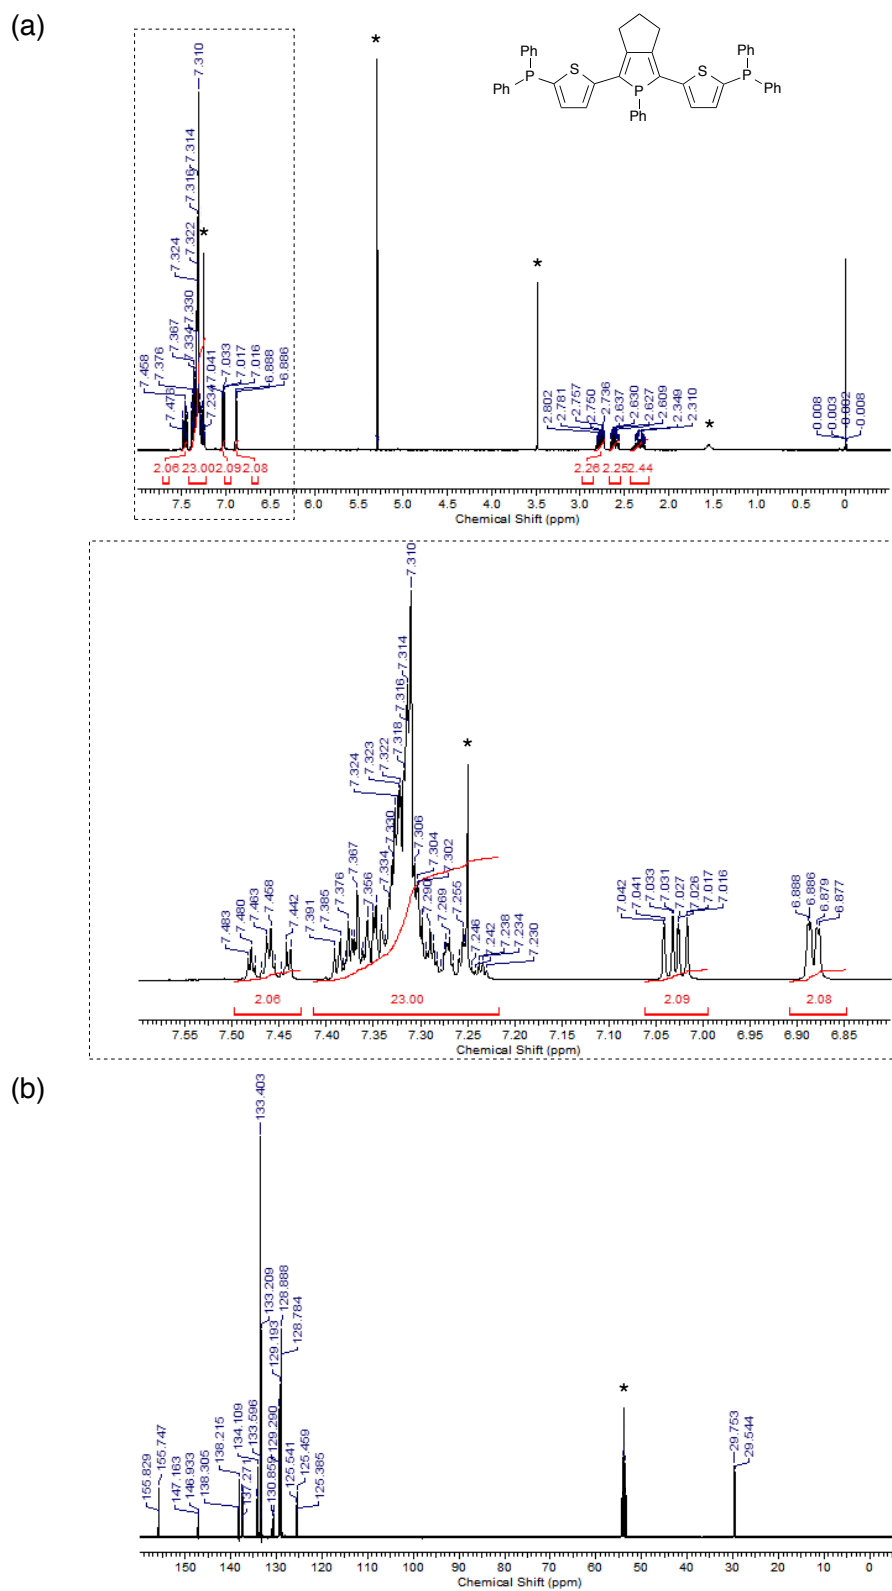

Fig. S11 (a)  $^1\text{H}$  NMR (in  $\text{CDCl}_3$ ) and (b)  $^{13}\text{C}\{^1\text{H}\}$  NMR spectra (in  $\text{CD}_2\text{Cl}_2$ ) of 7.

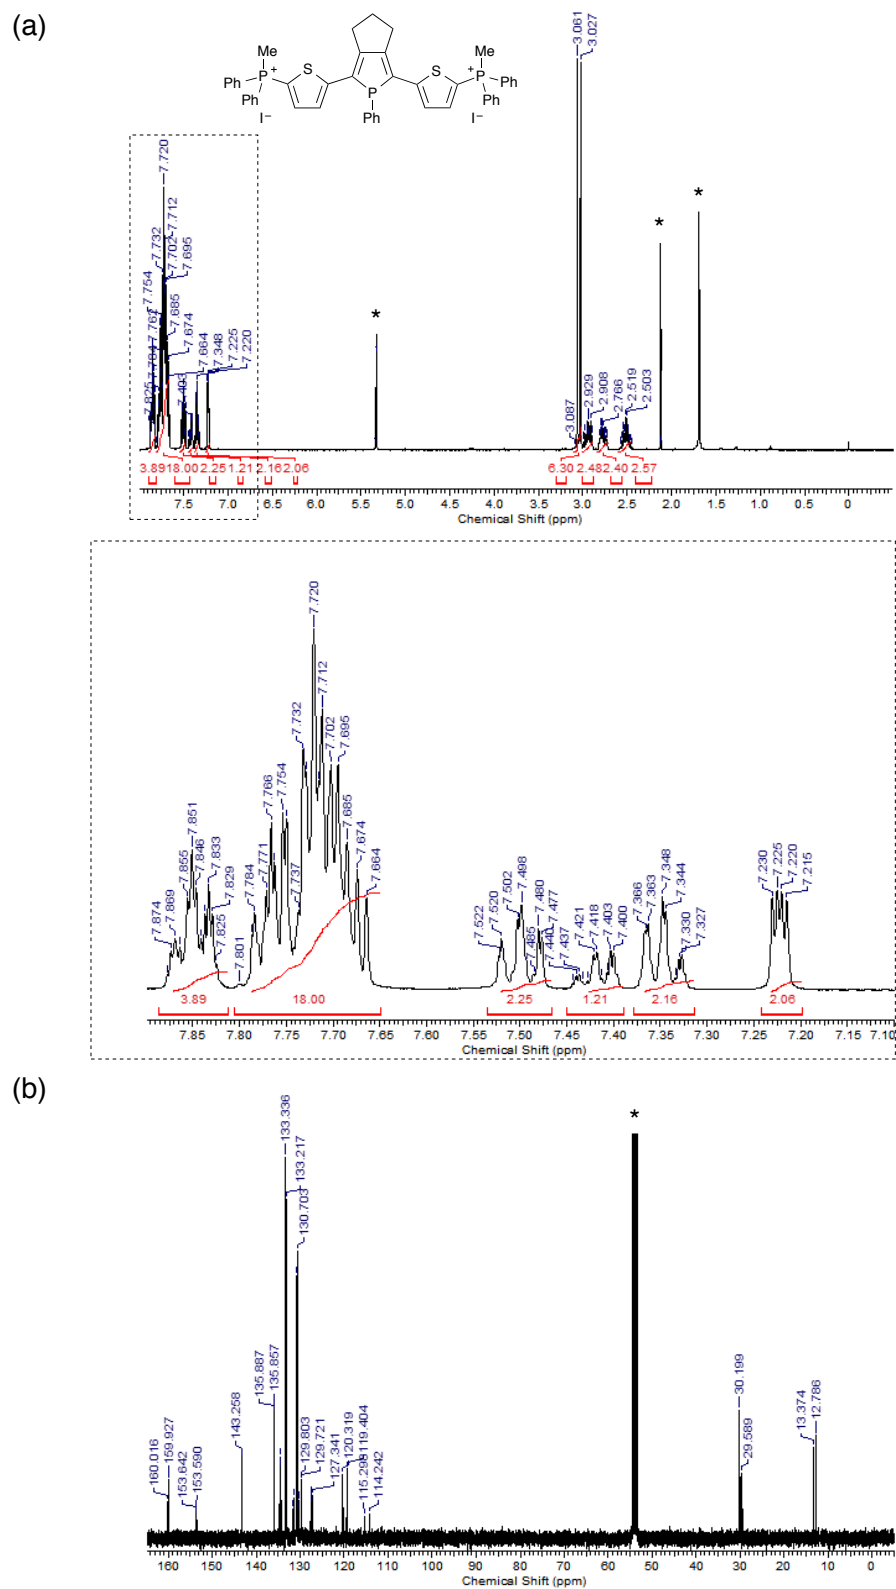

Fig. S12 (a)  $^1\text{H}$  NMR and (b)  $^{13}\text{C}\{^1\text{H}\}$  NMR spectra of **8** in  $\text{CD}_2\text{Cl}_2$ .

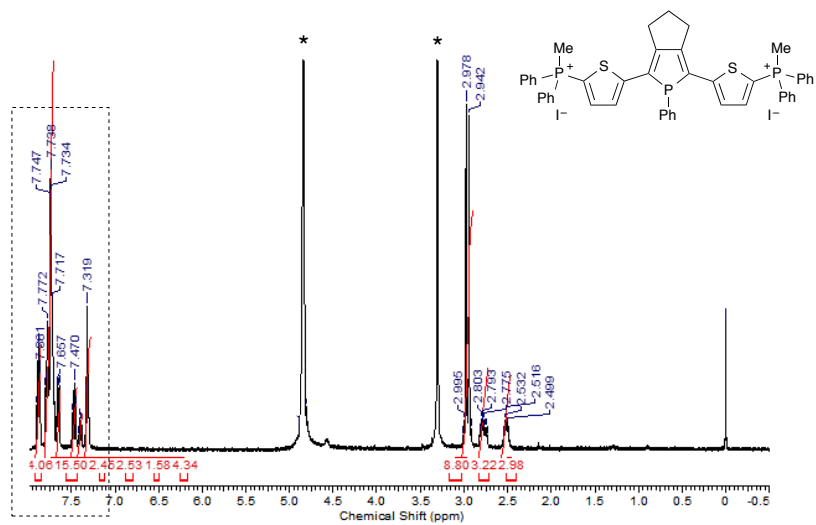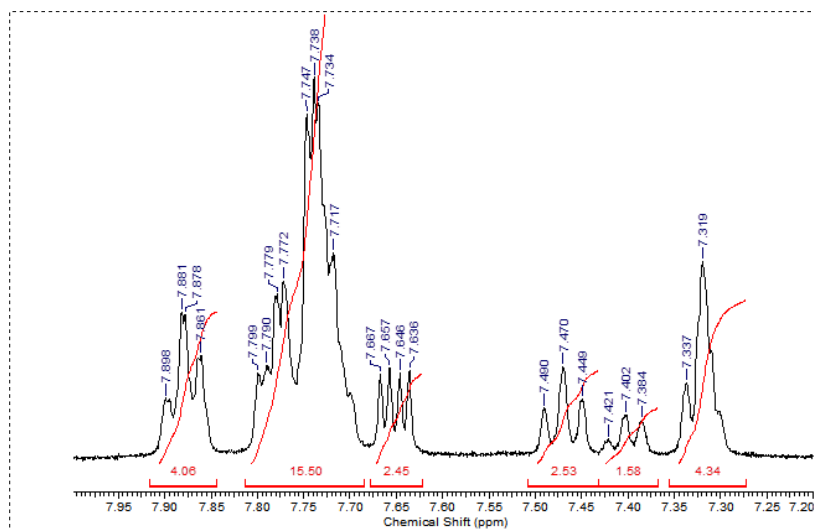

Fig. S13 <sup>1</sup>H NMR spectra of **8** in CD<sub>3</sub>OD.

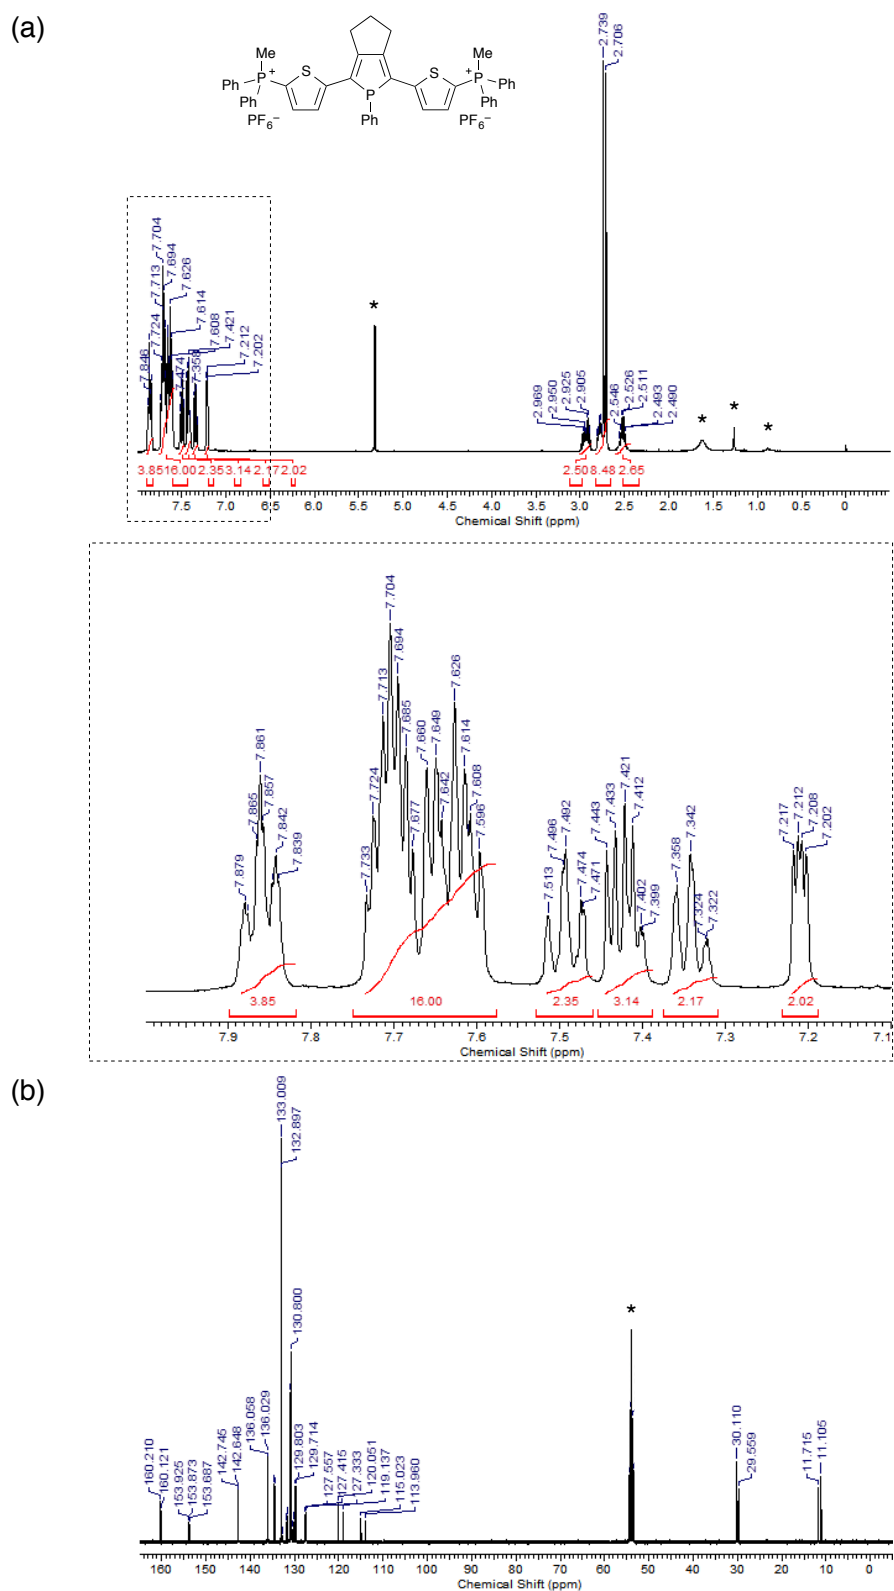

**Fig. S14** (a)  $^1\text{H}$  NMR and (b)  $^{13}\text{C}\{^1\text{H}\}$  NMR spectra of **9** in  $\text{CD}_2\text{Cl}_2$ .

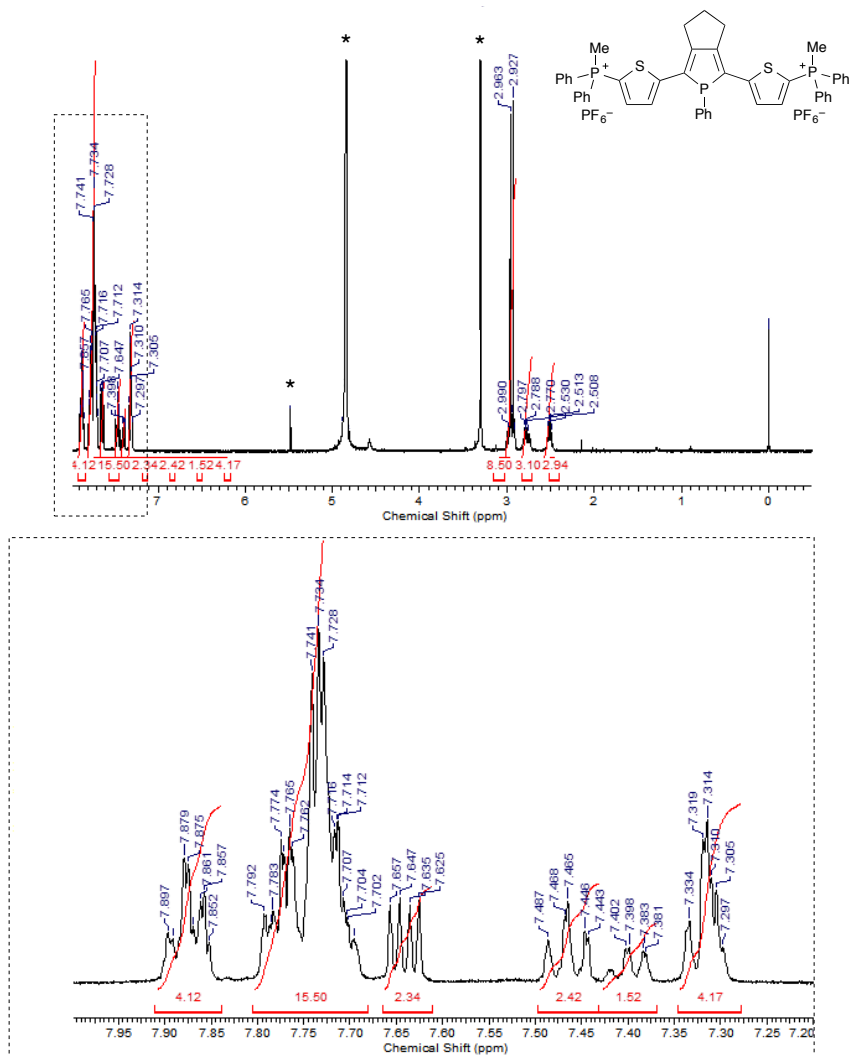

Fig. S15 <sup>1</sup>H NMR spectra of **9** in CD<sub>3</sub>OD.

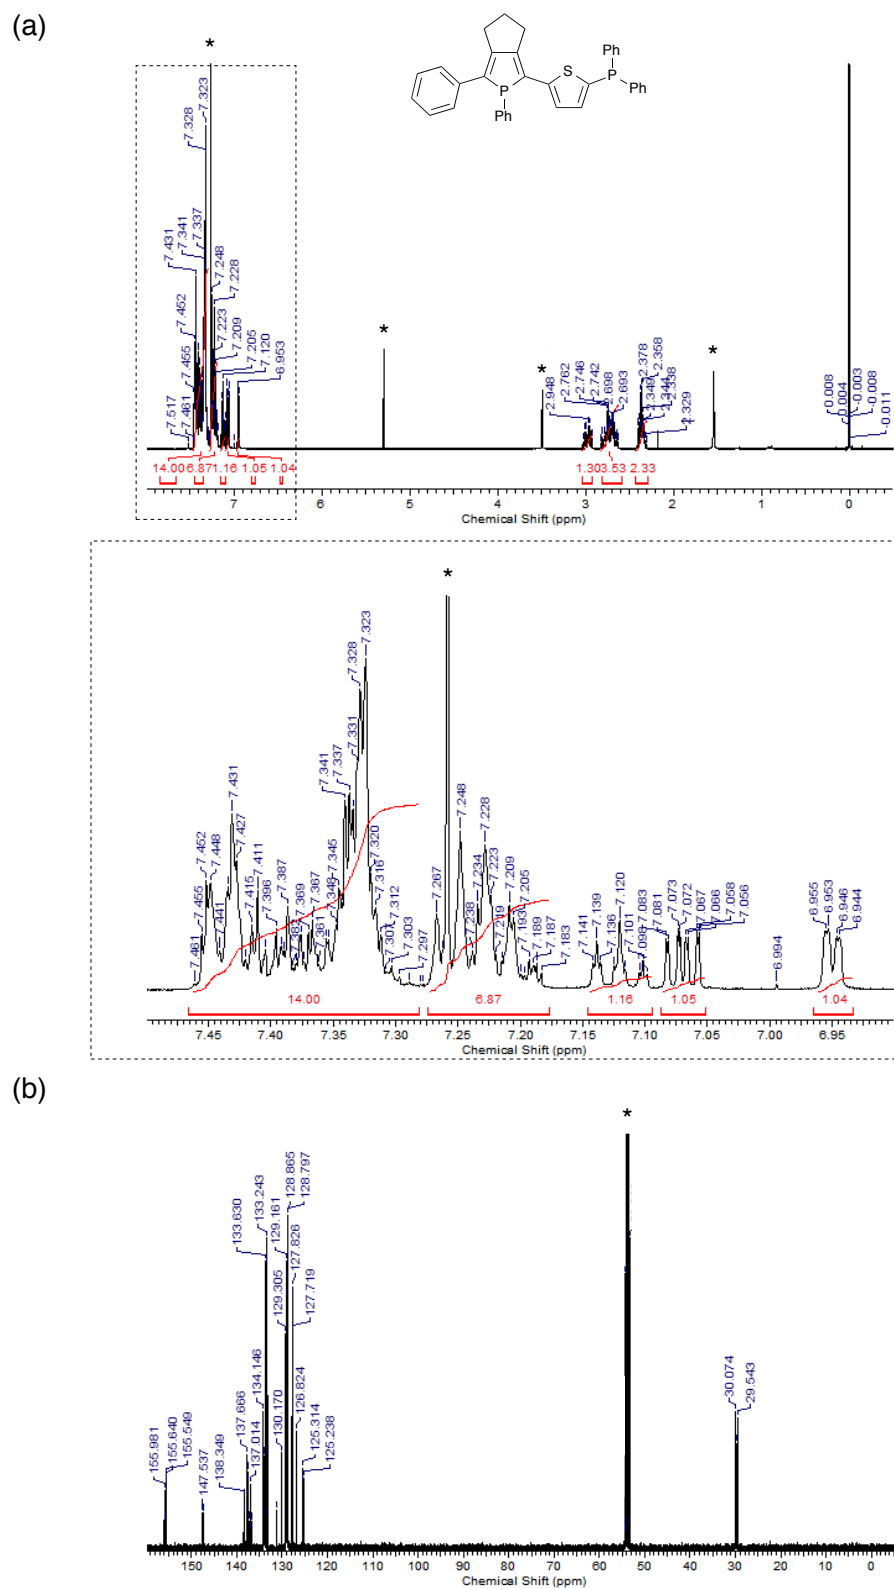

Fig. S16 (a) <sup>1</sup>H NMR (in CDCl<sub>3</sub>) and (b) <sup>13</sup>C{<sup>1</sup>H} NMR spectra (in CD<sub>2</sub>Cl<sub>2</sub>) of 10.

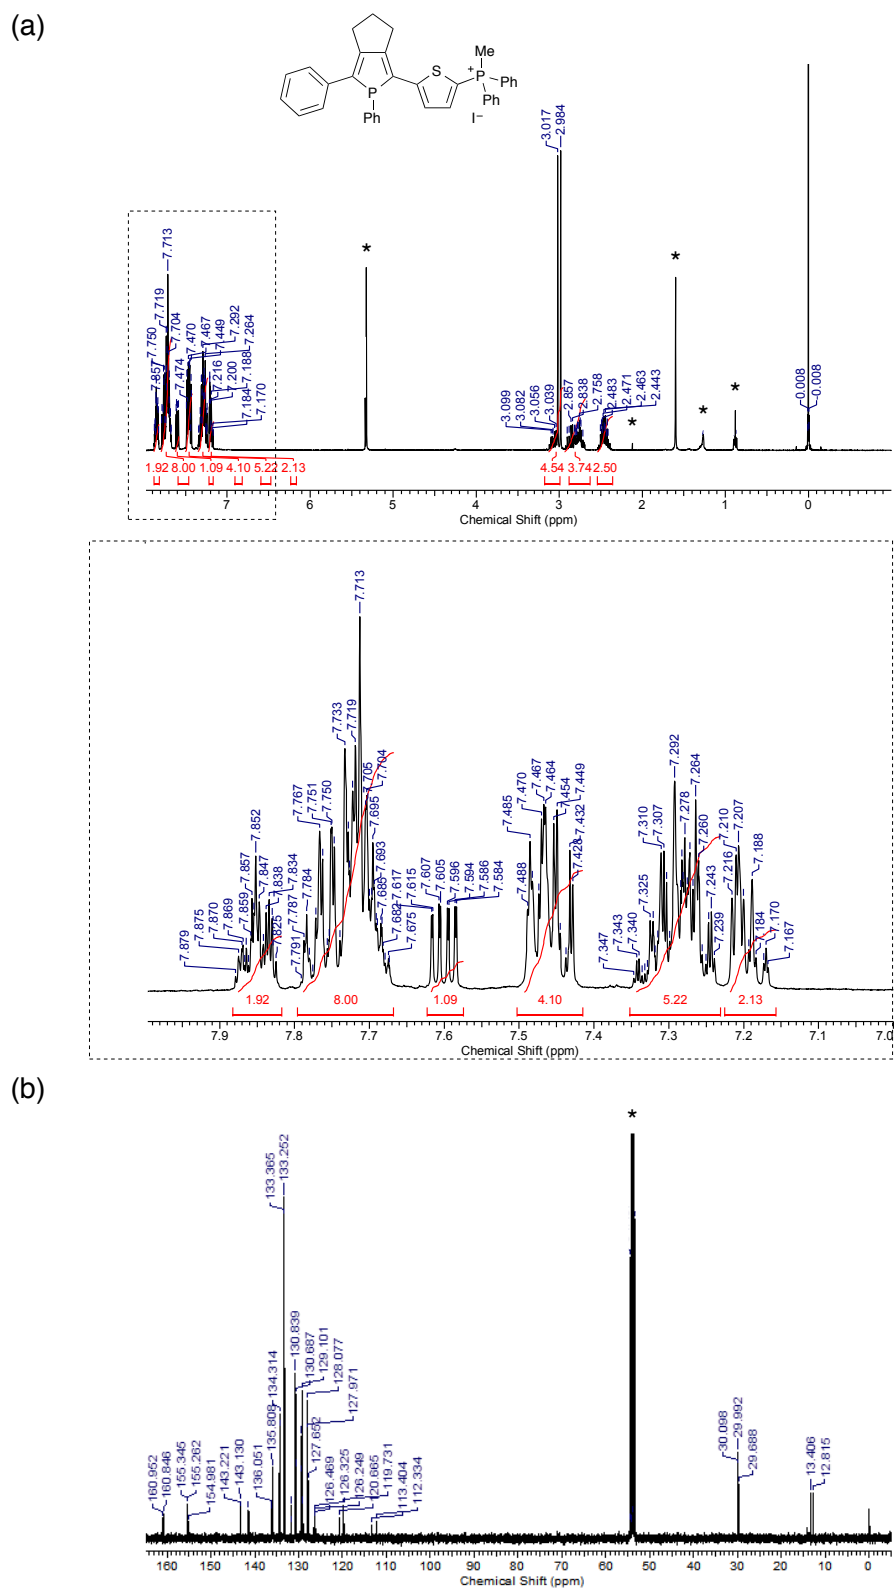

**Fig. S17** (a)  $^1\text{H}$  NMR and (b)  $^{13}\text{C}\{^1\text{H}\}$  NMR spectra of **11** in  $\text{CD}_2\text{Cl}_2$ .



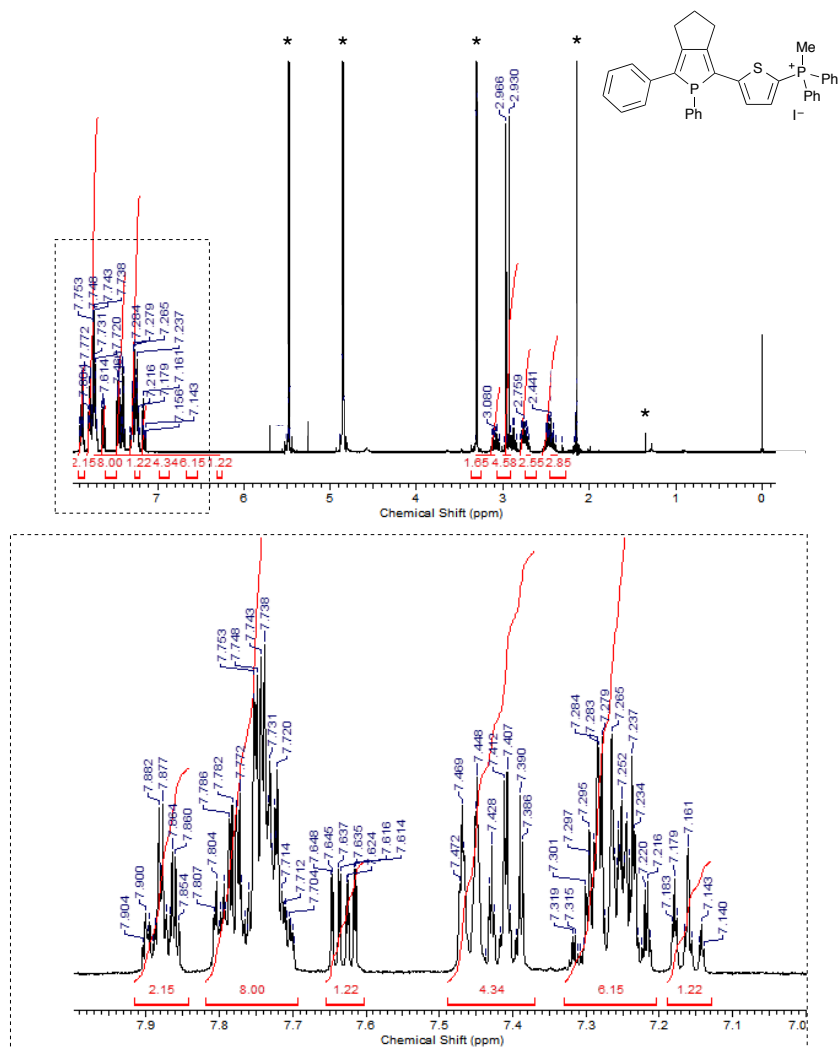

Fig. S18  $^1\text{H}$  NMR spectra of 11 in  $\text{CD}_3\text{OD}$ .

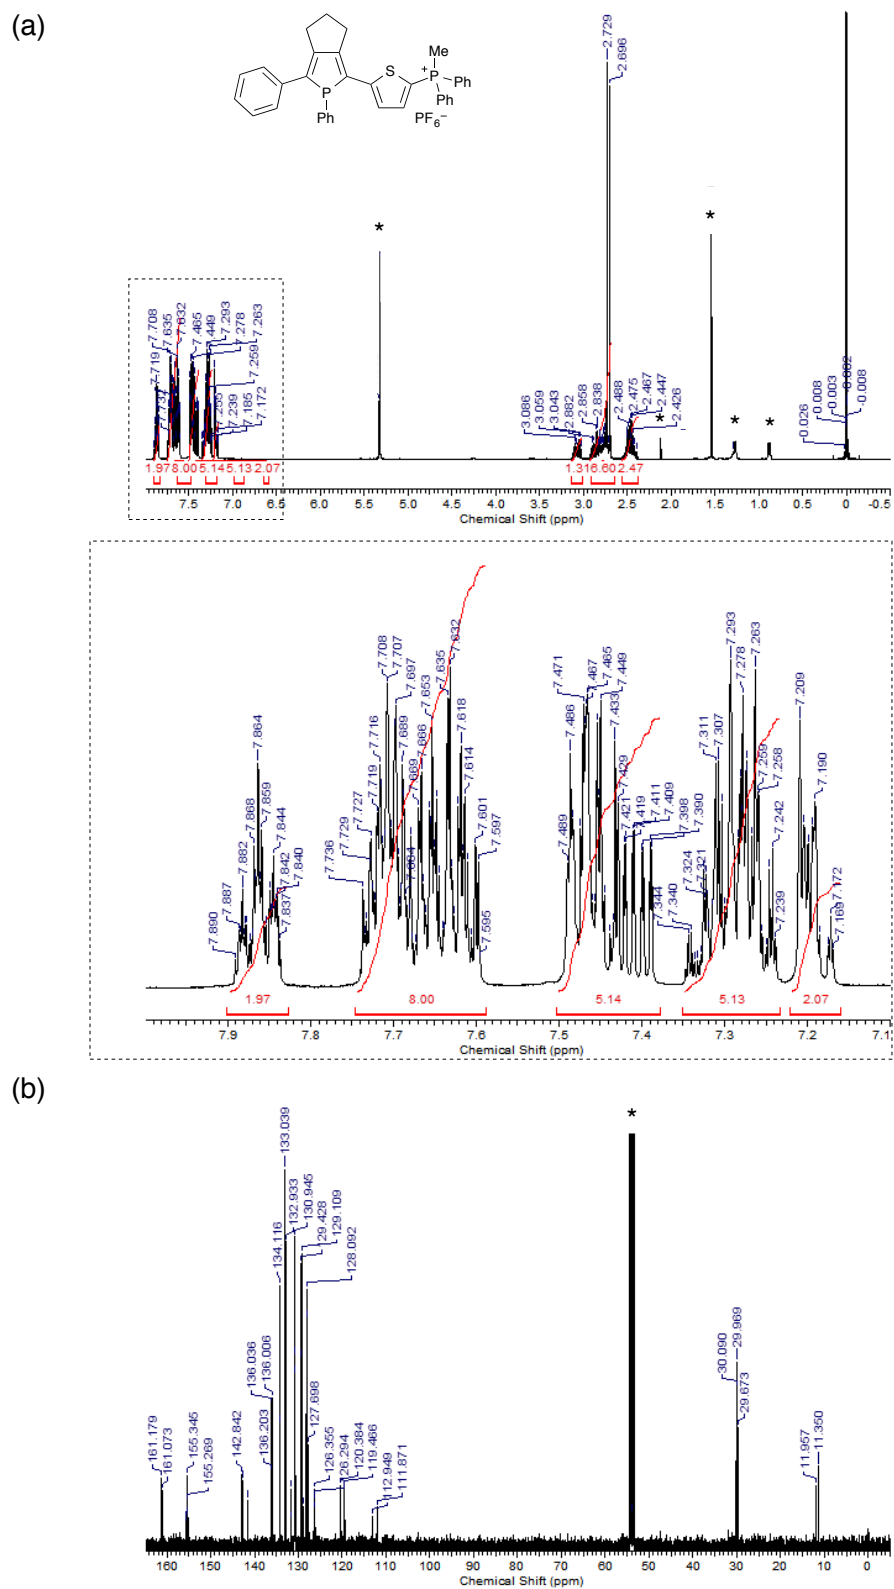

**Fig. S19** (a)  $^1\text{H}$  NMR and (b)  $^{13}\text{C}\{^1\text{H}\}$  NMR spectra of **12** in  $\text{CD}_2\text{Cl}_2$ .

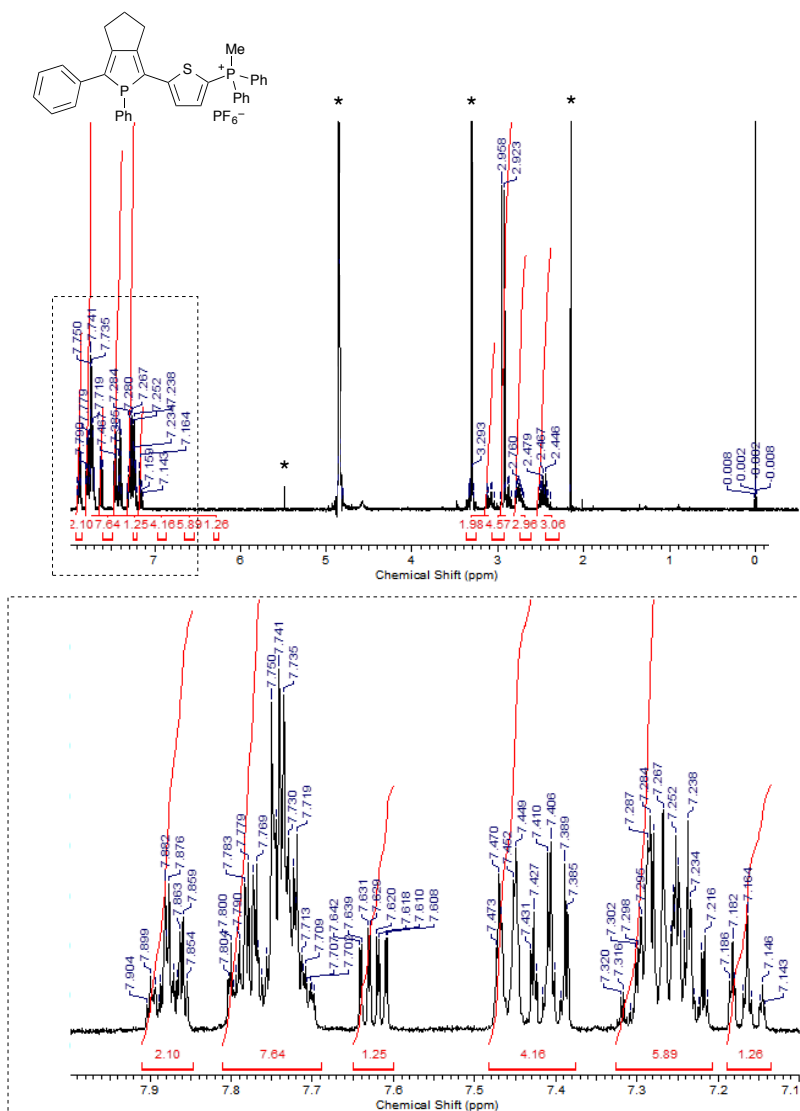

Fig. S20  $^1\text{H}$  NMR spectra of **12** in  $\text{CD}_3\text{OD}$ .
